# Supplementary material for: Magnetic interaction of photoexcited terbium–porphyrin complexes with non-aromatic ligands having different symmetries
Source: Royal Society of Chemistry journal article supplement (doi:10.1039/d2dt00306f), 2022-01-01
Supplement: d2dt00306f1.pdf [file d2dt00306f1.pdf]

## Electronic Supplementary Information

### Magnetic interaction in photoexcited terbium-porphyrin complexes with non-aromatic ligands having different symmetries

Langit Cahya Adi,<sup>a</sup> Anas Santria,<sup>a,b</sup> and Naoto Ishikawa<sup>\*a</sup>

<sup>a</sup>Department of Chemistry, Graduate School of Science, Osaka University, Toyonaka, Osaka 560-0043, Japan

<sup>b</sup>National Research and Innovation Agency, Jalan M.H. Thamrin No. 8, Jakarta Pusat, Jakarta 10340, Indonesia

Keywords : magnetic interaction, ferromagnetic, electronic structure and monoporphyrimato

\*Email: langitc19@chem.sci.osaka-u.ac.jp (L.C.A.)

asantria@chem.sci.osaka-u.ac.jp or anas.santria@brin.go.id (A.S.)

iskw@chem.sci.osaka-u.ac.jp (N.I.)

- Figure S1.** MALDI-TOF spectra of [Y(TPP)(12C4)]<sup>+</sup>  
**Figure S2.** MALDI-TOF spectra of [Y(TPP)(aza12C4)]<sup>+</sup>  
**Figure S3.** MALDI-TOF spectra of [Tb(TPP)(12C4)]<sup>+</sup>  
**Figure S4.** MALDI-TOF spectra of [Tb(TPP)(aza12C4)]<sup>+</sup>  
**Figure S5.** VT-VH-MCD spectrum of [Y(TPP)(12C4)]Cl in B band.  
**Figure S6.** VT-VH-MCD spectrum of [Y(TPP)(12C4)]Cl in Q band.  
**Figure S7.** Band deconvolution of absorption (**a**) and MCD (**b**) of B(0,0) band spectra [Y(TPP)(12C4)]Cl at 1.5 K and 1 T.  
**Figure S8.** Band deconvolution of absorption (**a**) and MCD (**b**) of Q(0,0) and Q(1,0) bands spectra [Y(TPP)(12C4)]Cl at 1.5 K and 1 T.  
**Figure S9.** A<sub>1</sub>/D<sub>0</sub> ratio vs. temperature and magnetic field plot of [Y(TPP)(12C4)]Cl  
**Figure S10.** VT-VH-MCD spectrum of [Y(TPP)(aza12C4)]Cl in B band.  
**Figure S11.** VT-VH-MCD spectrum of [Y(TPP)(aza12C4)]Cl in Q band.  
**Figure S12.** Band deconvolution of absorption (**a**) and MCD (**b**) of B(0,0) band spectra [Y(TPP)(aza12C4)]Cl at 1.5 K and 1 T.  
**Figure S13.** Band deconvolution of absorption (**a**) and MCD (**b**) of Q(0,0) and Q(1,0) bands spectra [Y(TPP)(aza12C4)]Cl at 1.5 K and 1 T.  
**Figure S14.** A<sub>1</sub>/D<sub>0</sub> ratio vs. temperature and magnetic field plot of [Y(TPP)(aza12C4)]Cl.  
**Figure S15.** Band deconvolution of absorption (**a**) and MCD (**b**) of B(0,0) band spectra [Tb(TPP)(12C4)]Cl at 1.5 K and 1 T.  
**Figure S16.** Band deconvolution of absorption (**a**) and MCD (**b**) of Q(0,0) and Q(1,0) bands spectra [Tb(TPP)(12C4)]Cl at 1.5 K and 1 T.  
**Figure S17.** Band deconvolution of absorption (**a**) and MCD (**b**) of B(0,0) band spectra [Tb(TPP)(aza12C4)]Cl at 1.5 K and 1 T.  
**Figure S18.** Band deconvolution of absorption (**a**) and MCD (**b**) of Q(0,0) and Q(1,0) bands spectra [Tb(TPP)(aza12C4)]Cl at 1.5 K and 1 T.  
**Table S1.** Parameters of B and Q bands determined by the band deconvolution of absorption and MCD spectra of [Y(TPP)(12C4)]Cl incorporated into PMMA.  
**Table S2.** Parameters of B and Q bands determined by the band deconvolution of absorption and MCD spectra of [Y(TPP)(aza12C4)]Cl incorporated into PMMA.  
**Table S3.** Parameters of B and Q bands determined by the band deconvolution of

|                   |                                                                                                                                                |
|-------------------|------------------------------------------------------------------------------------------------------------------------------------------------|
|                   | absorption and MCD spectra of [Tb(TPP)(12C4)]Cl incorporated into PMMA.                                                                        |
| <b>Table S4.</b>  | Parameters of B and Q bands determined by the band deconvolution of absorption and MCD spectra of [Tb(TPP)(aza12C4)]Cl incorporated into PMMA. |
| <b>Table S5.</b>  | The description of Basis Sets for calculation of the [Ln(TPP)(L2)] <sup>+</sup> (Ln = Y and Tb; L2 = 12C4 and aza12C4) complexes.              |
| <b>Table S6.</b>  | Dipole transition strengths for [Y(TPP)(12C4)] <sup>+</sup> obtained from RASSCF/RASSI/single_aniso calculations.                              |
| <b>Table S7.</b>  | Low-Lying Spin Orbit of [Y(TPP)(12C4)] <sup>+</sup> obtained from RASSCF/RASSI/single_aniso calculations.                                      |
| <b>Table S8.</b>  | Dipole transition strengths for [Y(TPP)(aza12C4)] <sup>+</sup> obtained from RASSCF/RASSI/single_aniso calculations.                           |
| <b>Table S9.</b>  | Low-Lying Spin Orbit of [Y(TPP)(aza12C4)] <sup>+</sup> obtained from RASSCF/RASSI/single_aniso calculations.                                   |
| <b>Table S10.</b> | Composition of wave functions for [Tb(TPP)(12C4)] <sup>+</sup> as extracted from RASSCF/RASSI/single_aniso calculations with basis set 1.      |
| <b>Table S11.</b> | Composition of wave functions for [Tb(TPP)(12C4)] <sup>+</sup> as extracted from RASSCF/RASSI/single_aniso calculations with basis set 2.      |
| <b>Table S12.</b> | Composition of wave functions for [Tb(TPP)(aza12C4)] <sup>+</sup> as extracted from RASSCF/RASSI/single_aniso calculations with basis set 1.   |
| <b>Table S13.</b> | Composition of wave functions for [Tb(TPP)(aza12C4)] <sup>+</sup> as extracted from RASSCF/RASSI/single_aniso calculations with basis set 2.   |
| <b>Table S14.</b> | Dipole transition strengths for [Tb(TPP)(12C4)] <sup>+</sup> obtained from RASSCF/RASSI/single_aniso calculations.                             |
| <b>Table S15.</b> | Low-Lying Spin Orbit of [Tb(TPP)(12C4)] <sup>+</sup> obtained from RASSCF/RASSI/single_aniso calculations.                                     |

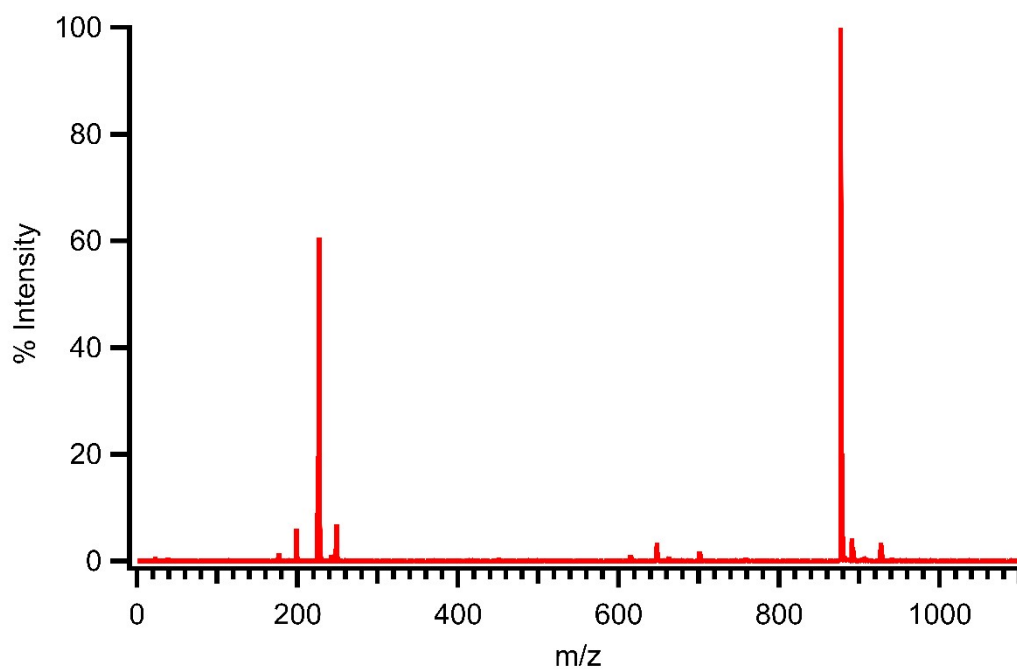

**Figure S1.** MALDI-TOF spectra of  $[Y(TPP)(12C4)]^+$  with dithranol as matrix ( $C_{14}H_{10}O_3$ ) at  $m/z$  equal 227.07.

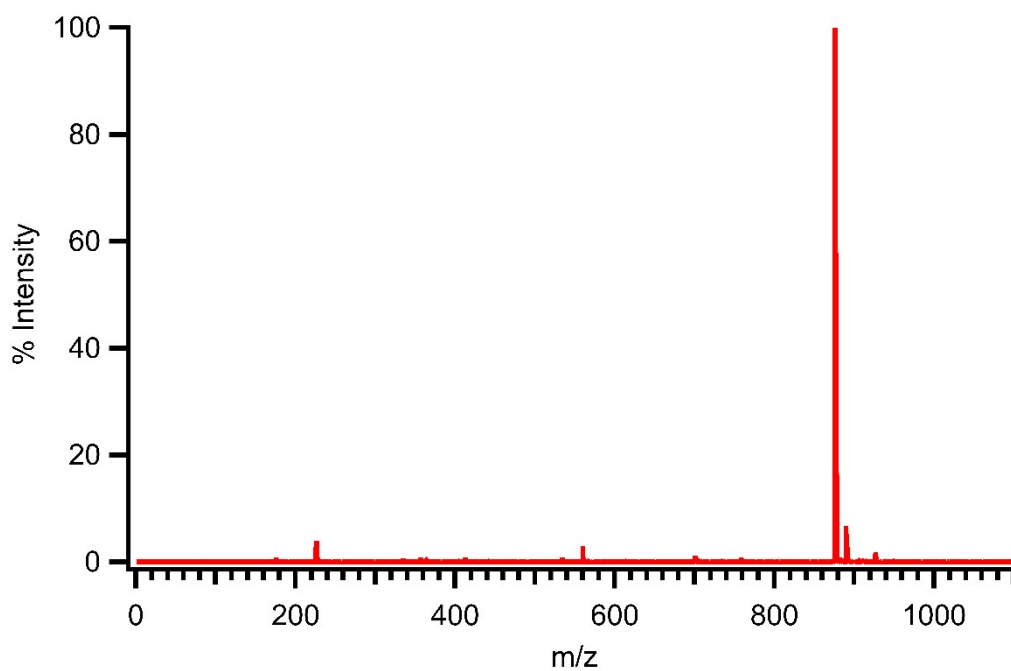

**Figure S2.** MALDI-TOF spectra of  $[Y(TPP)(aza12C4)]^+$  with dithranol as matrix ( $C_{14}H_{10}O_3$ ) at  $m/z$  equal 227.06.

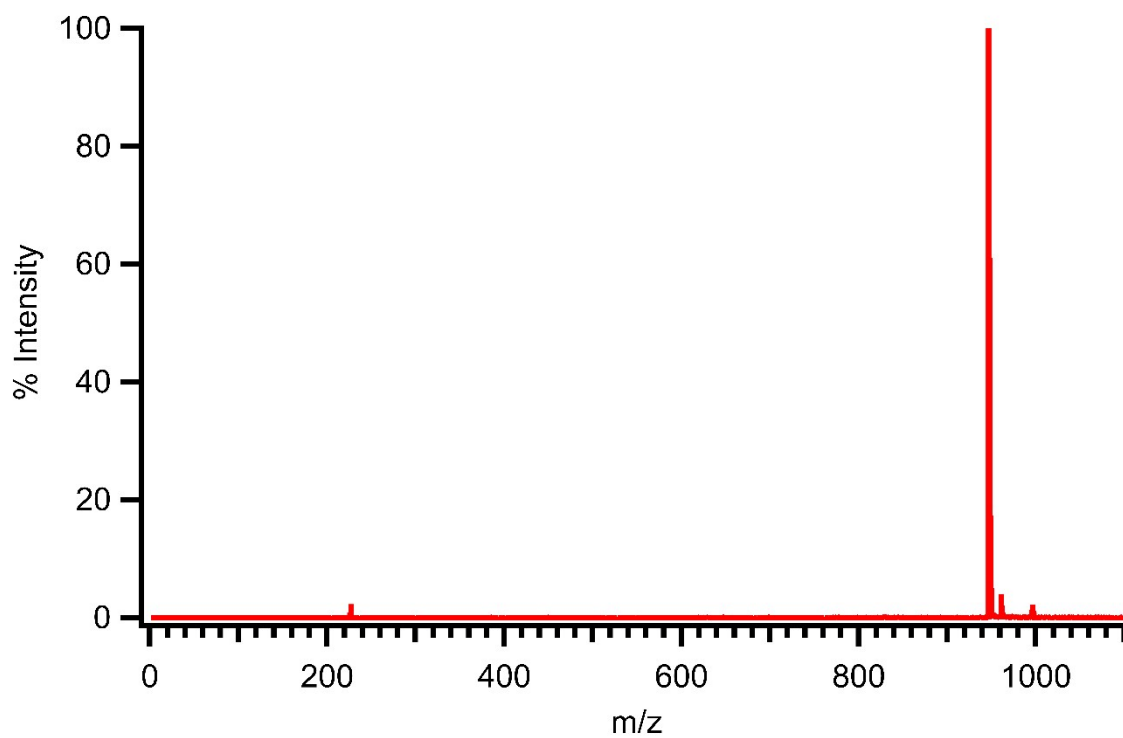

**Figure S3.** MALDI-TOF spectra of  $[\text{Tb}(\text{TPP})(12\text{C}4)]^+$  with dithranol as matrix ( $\text{C}_{14}\text{H}_{10}\text{O}_3$ ) at  $m/z$  equal 227.06.

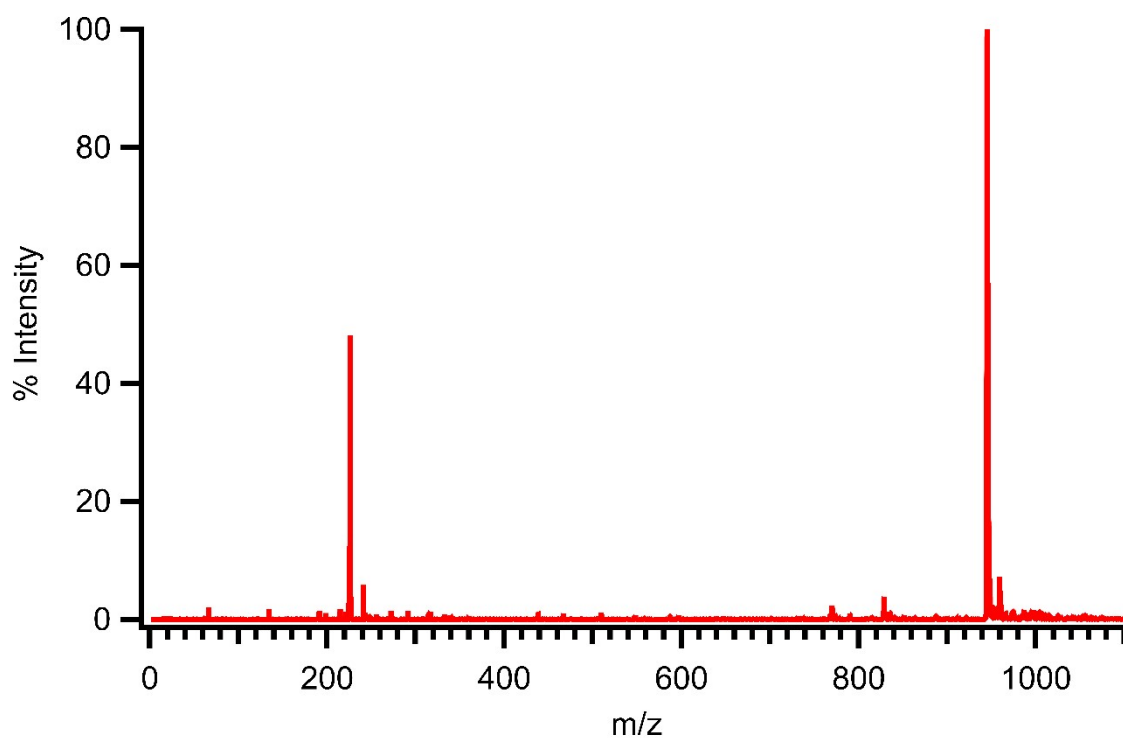

**Figure S4.** MALDI-TOF spectra of  $[\text{Tb}(\text{TPP})(\text{aza}12\text{C}4)]^+$  with dithranol as matrix ( $\text{C}_{14}\text{H}_{10}\text{O}_3$ ) at  $m/z$  equal 227.06.

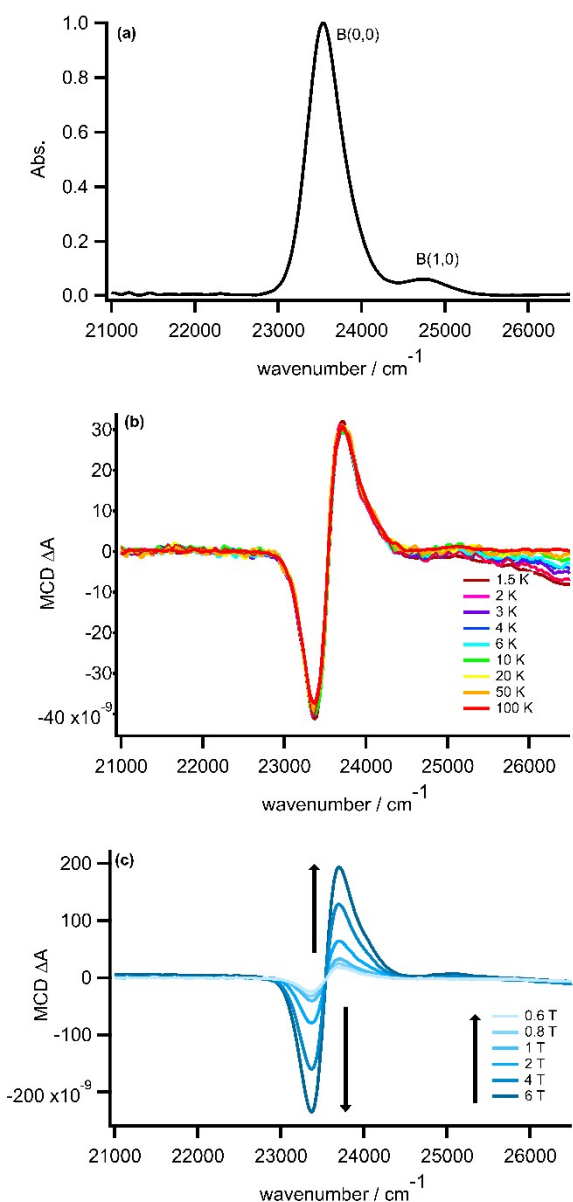

**Figure S5.** (a) Absorption, (b) temperature-dependent MCD spectra measured at temperatures of 1.5-100 K under a magnetic field of 1 T, and (c) magnetic field-dependent MCD spectra measured at temperatures of 1.5 K of B band in [Y(TPP)(12C4)]Cl in PMMA film.

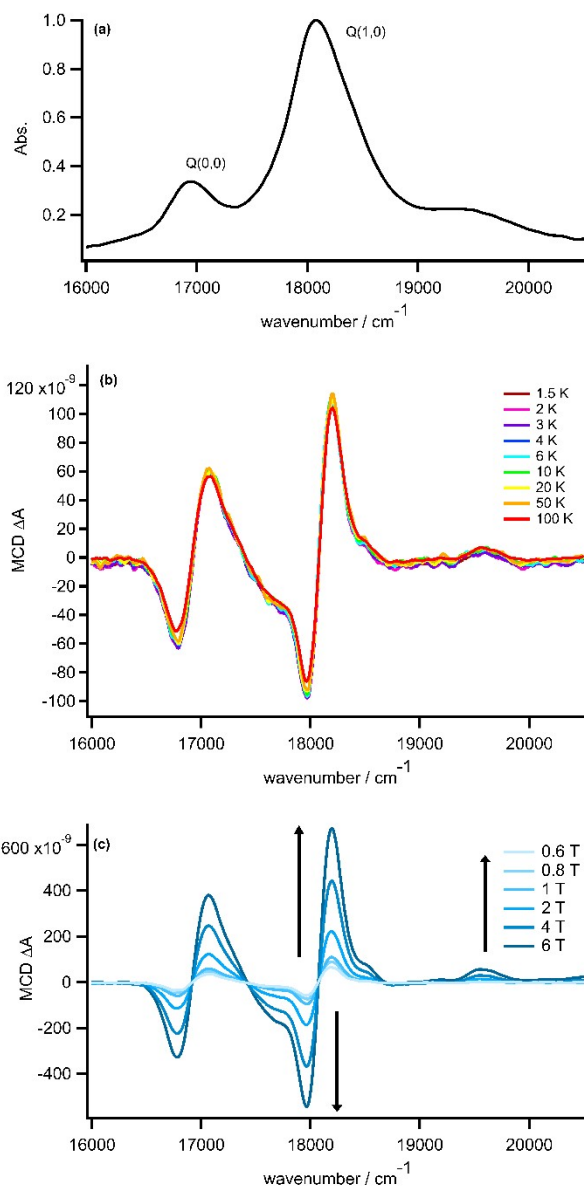

**Figure S6.** (a) Absorption, (b) temperature-dependent MCD spectra measured at temperatures of 1.5-100 K under a magnetic field of 1 T, and (c) magnetic field-dependent MCD spectra measured at temperatures of 1.5 K of Q band in [Y(TPP)(12C4)]Cl in PMMA film.

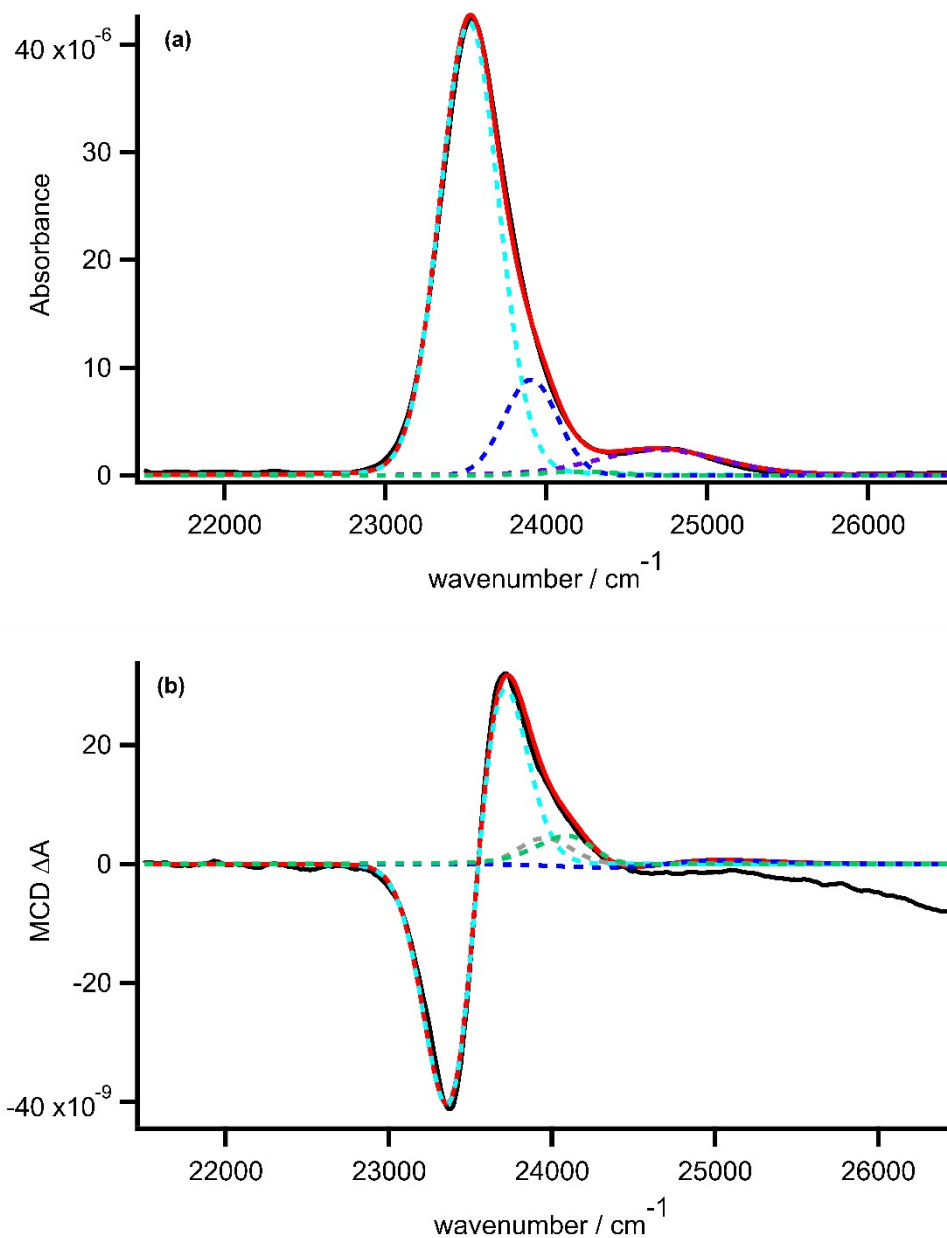

**Figure S7.** Band deconvolution of absorption (a) and MCD (b) of B(0,0) band spectra [Y(TPP)(12C4)]Cl at 1.5 K and 1 T. Experimental spectra is shown in black while simulated band is in red color. The components that give the simulated band are in dashed lines.

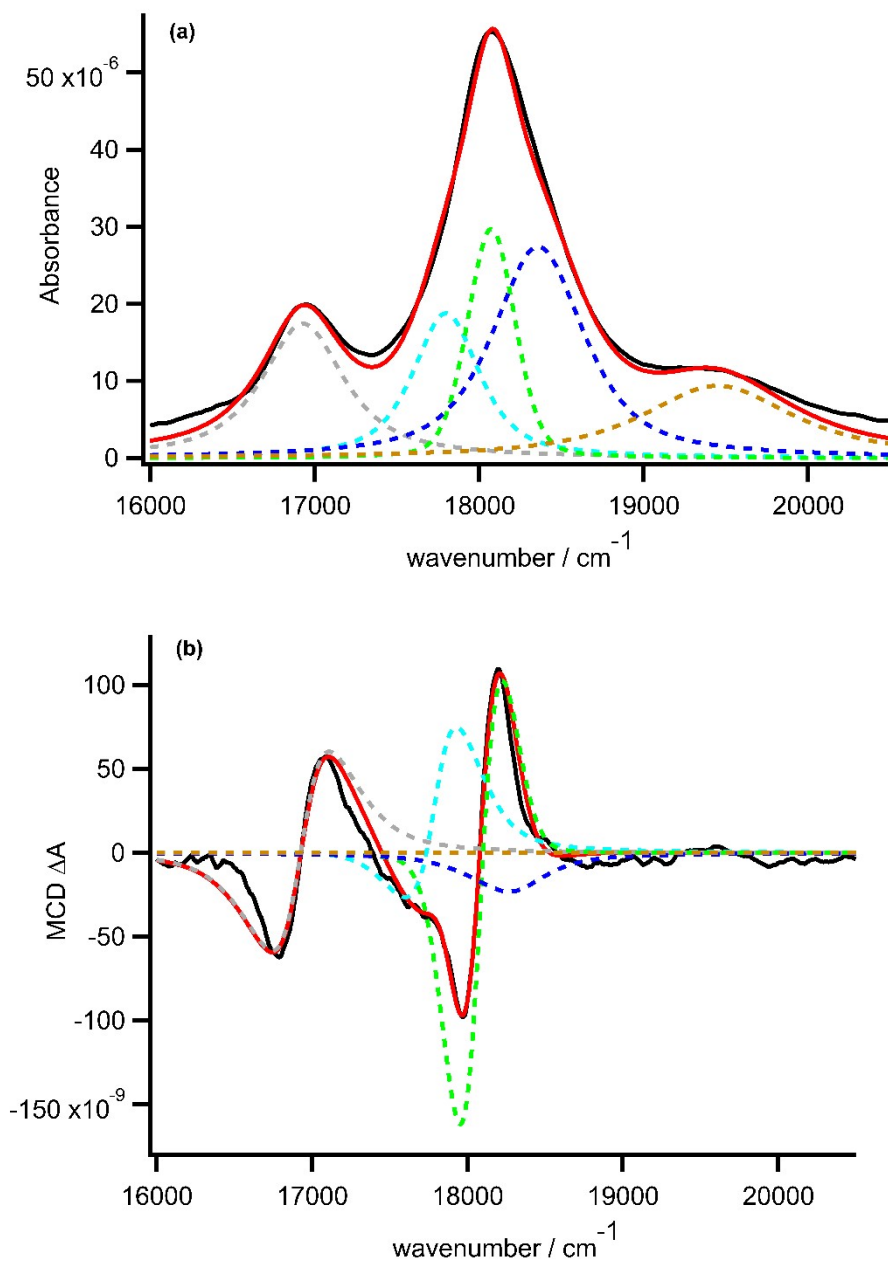

**Figure S8.** Band deconvolution of absorption (a) and MCD (b) of Q(0,0) and Q(1,0) bands spectra [Y(TPP)(12C4)]Cl at 1.5 K and 1 T. Experimental spectra is shown in black while simulated band is in red color. The components that give the simulated band are in dashed lines.

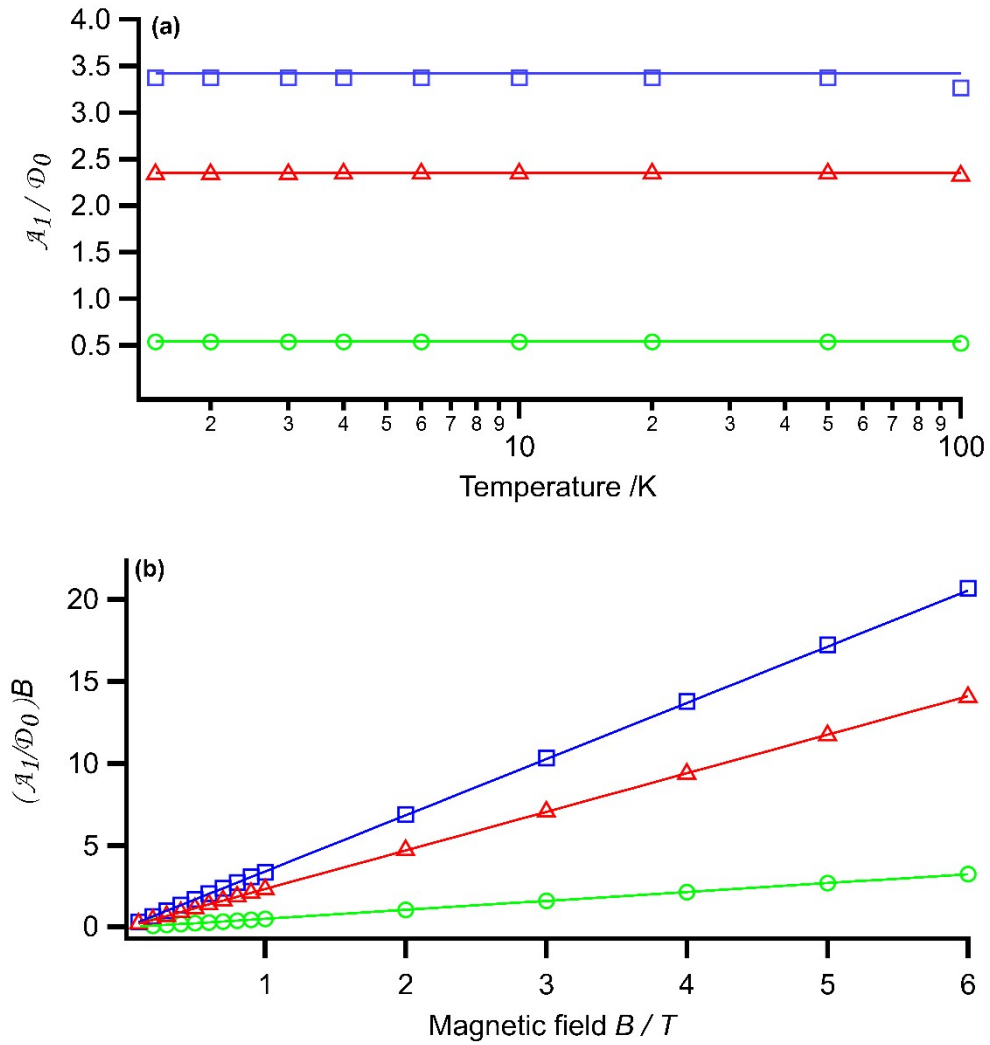

**Figure S9.** Experimental values (squares, triangles, and circles) and calculated value (straight line) of  $A_1/D_0$  of  $[Y(TPP)(12C_4)]Cl$  for B(0,0) in green, Q(1,0) in red, and Q(0,0) in blue under 1 T of magnetic field with varied temperature (a) and under varied magnetic field.



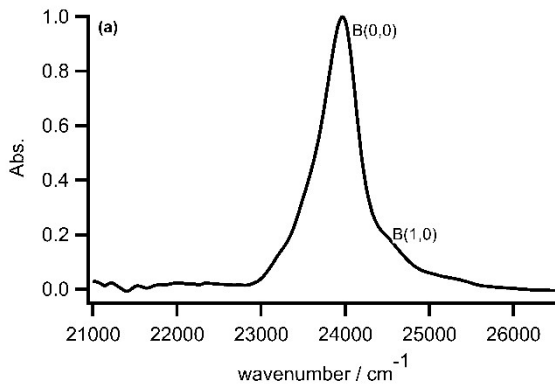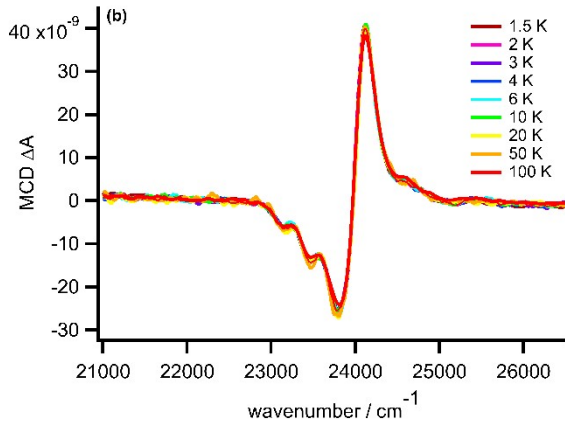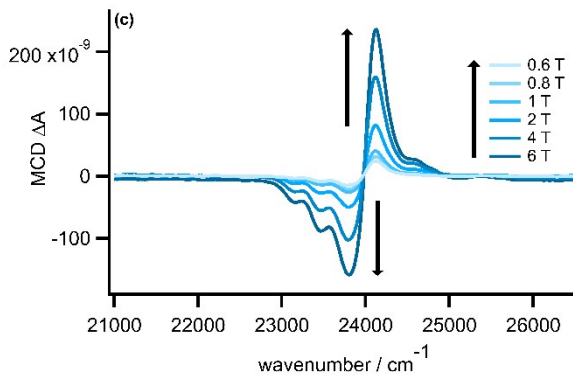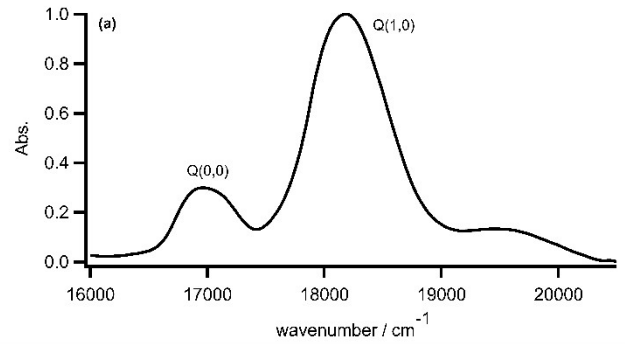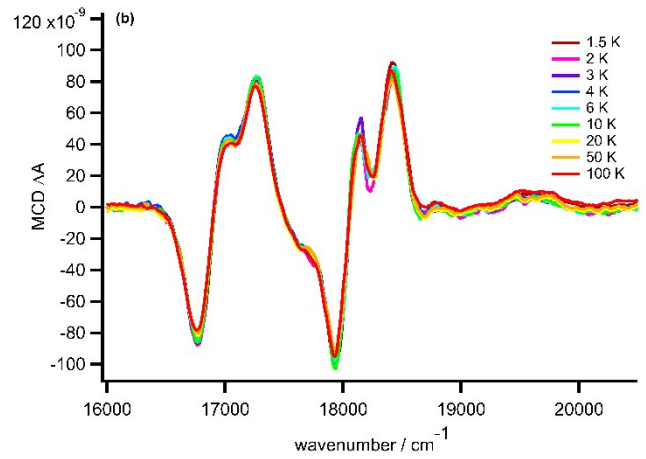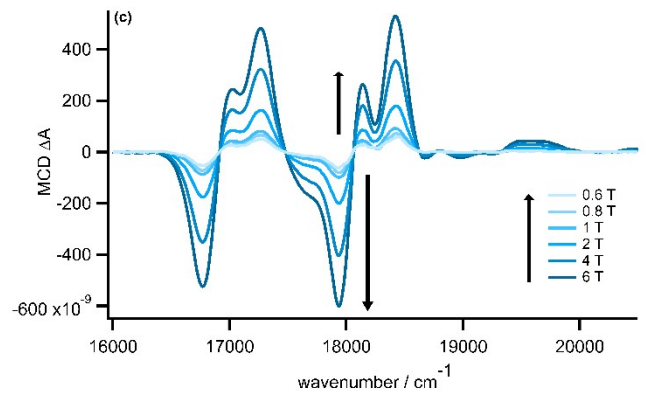

**Figure S10.** (a) Absorption, (b) temperature-dependent MCD spectra measured at temperatures of 1.5-100 K under a magnetic field of 1 T, and (c) magnetic field-dependent MCD spectra measured at temperatures of 1.5 K of B band in [Y(TPP)(aza12C4)]Cl in PMMA film.

**Figure S11** (a) Absorption, (b) temperature-dependent MCD spectra measured at temperatures of 1.5-100 K under a magnetic field of 1 T, and (c) magnetic field-dependent MCD spectra measured at temperatures of 1.5 K of Q band in [Y(TPP)(aza12C4)]Cl in PMMA film.

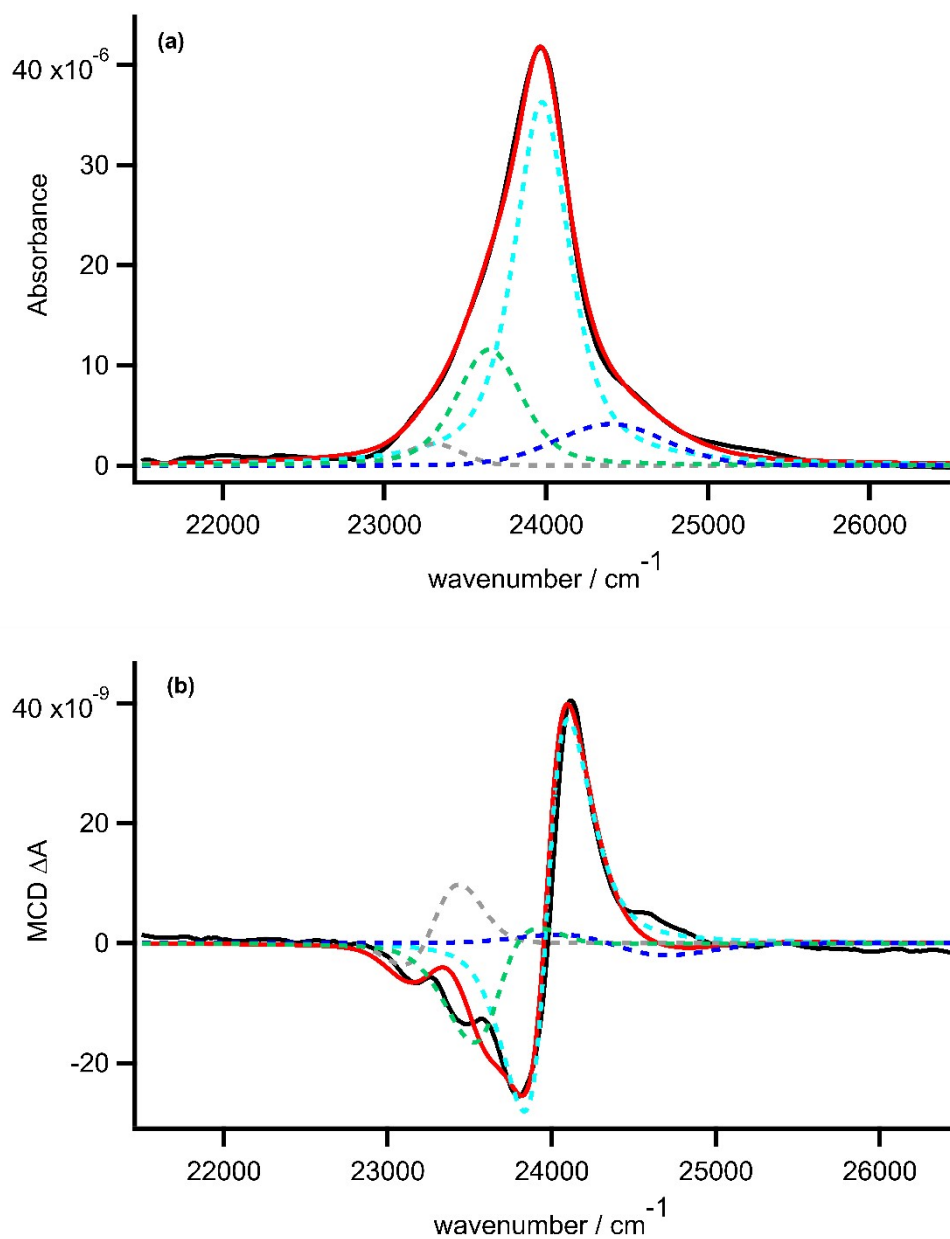

**Figure S12.** Band deconvolution of absorption (a) and MCD (b) of B(0,0) band spectra [Y(TPP)(aza12C4)]Cl at 1.5 K and 1 T. Experimental spectra is shown in black while simulated band is in red color. The components that give the simulated band are in dashed lines.

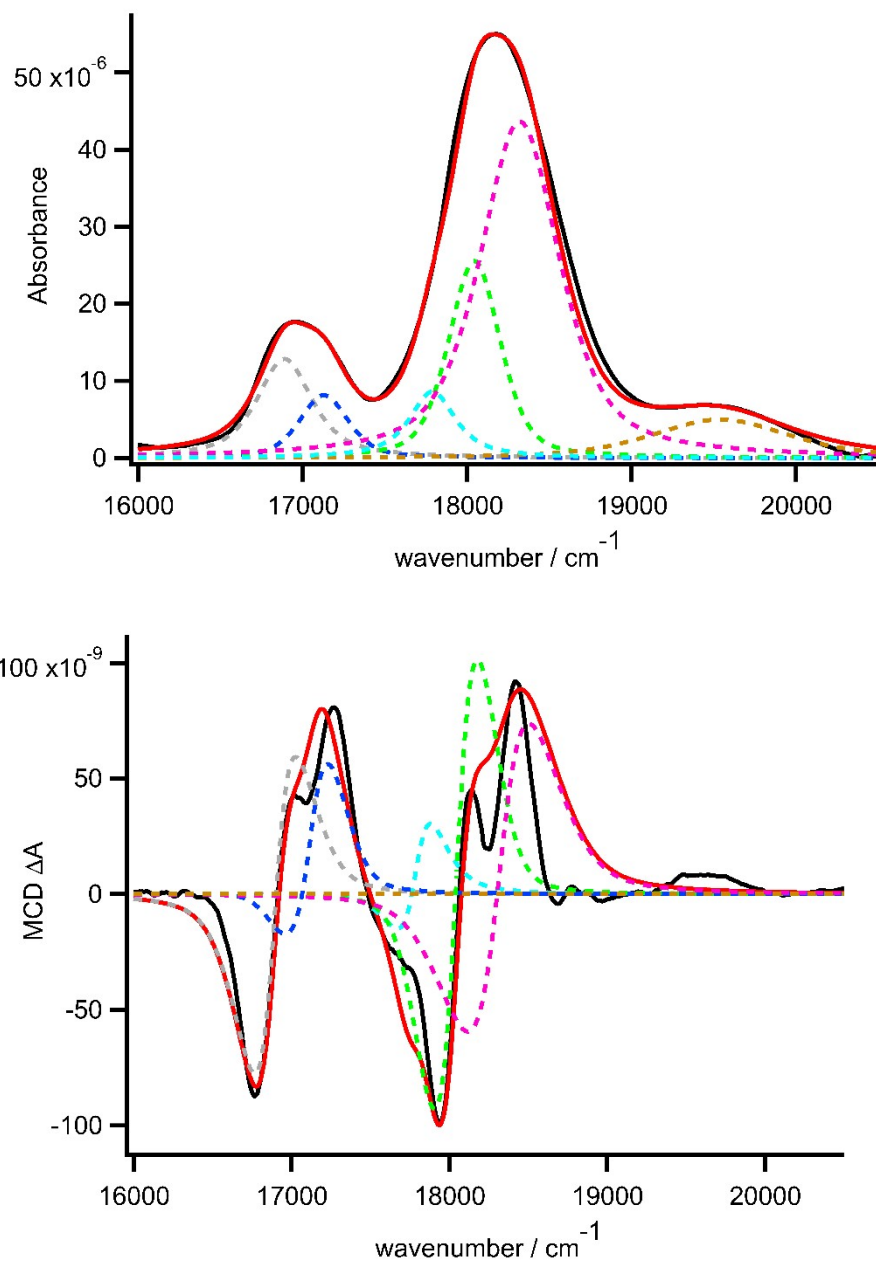

**Figure S13.** Band deconvolution of absorption (a) and MCD (b) of Q(0,0) and Q(1,0) bands spectra  $[\text{Y}(\text{TPP})(\text{aza}12\text{C}4)]\text{Cl}$  at 1.5 K and 1 T. Experimental spectra is shown in black while simulated band is in red color. The components that give the simulated band are in dashed lines.

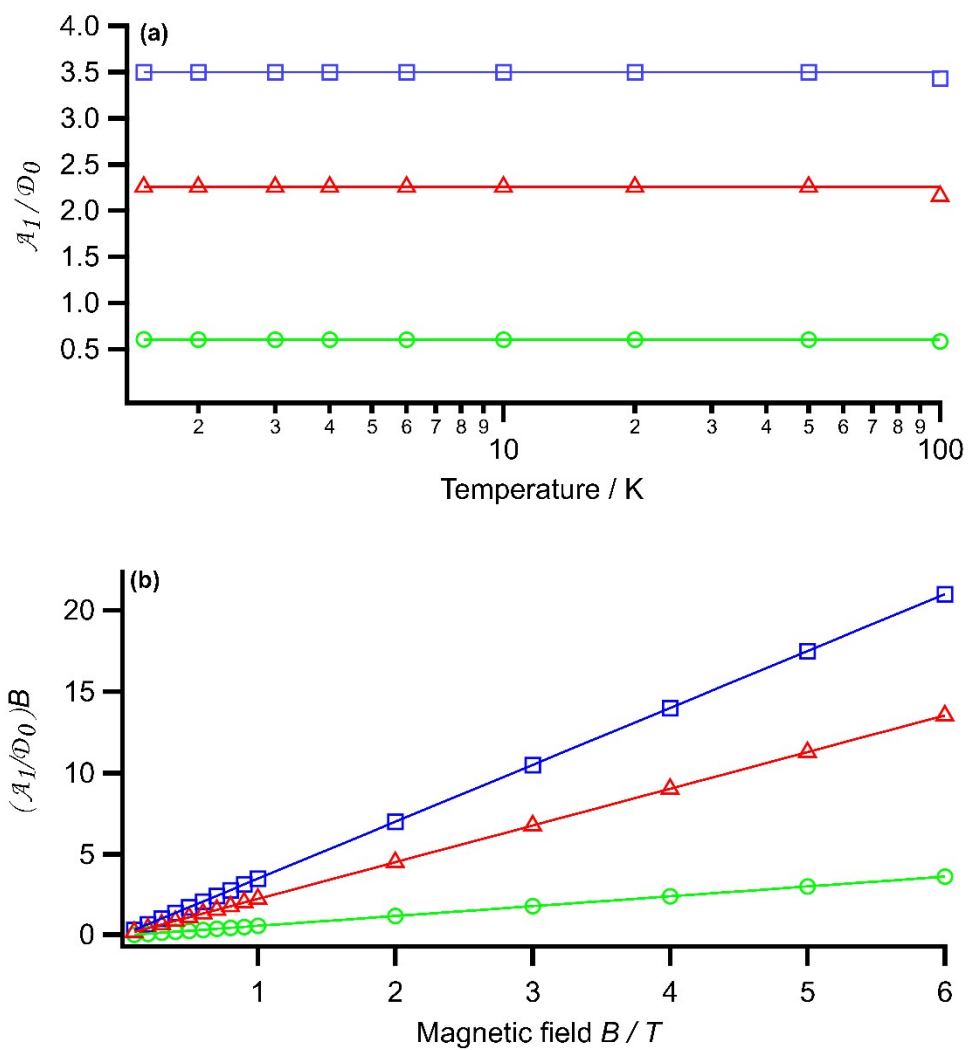

**Figure S14.** Experimental values (squares, triangles, and circles) and calculated value (straight line) of  $A_1/D_0$  of  $[Y(TPP)(aza12C4)]Cl$  for B(0,0) in green, Q(1,0) in red, and Q(0,0) in blue under 1 T of magnetic field with varied temperature **(a)** and under varied magnetic field at 1.5 K **(b)**.

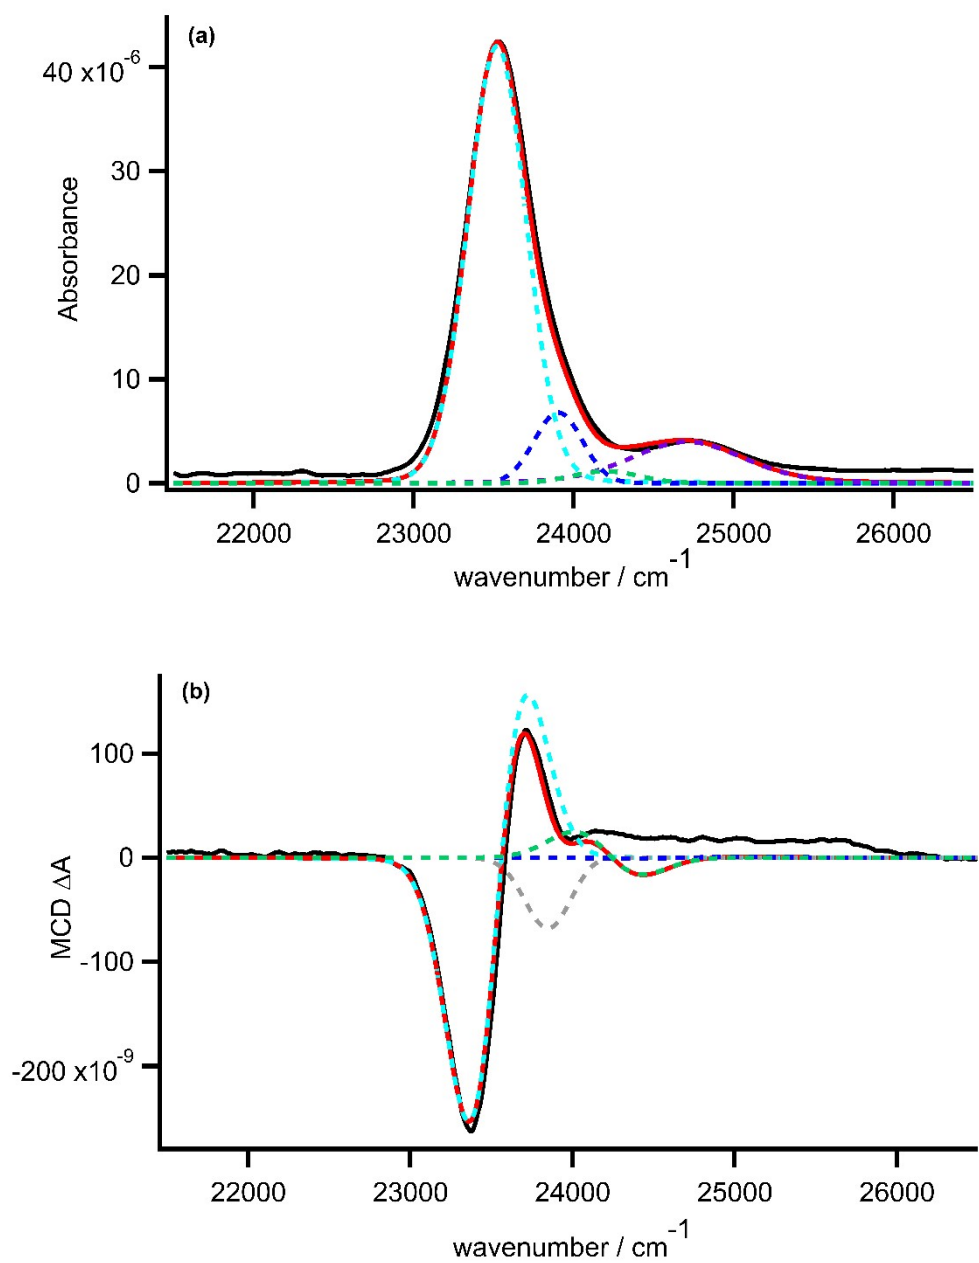

**Figure S15.** Band deconvolution of absorption (a) and MCD (b) of B(0,0) band spectra [Tb(TPP)(12C4)]Cl at 1.5 K and 1 T. Experimental spectra is shown in black while simulated band is in red color. The components that give the simulated band are in dashed lines.

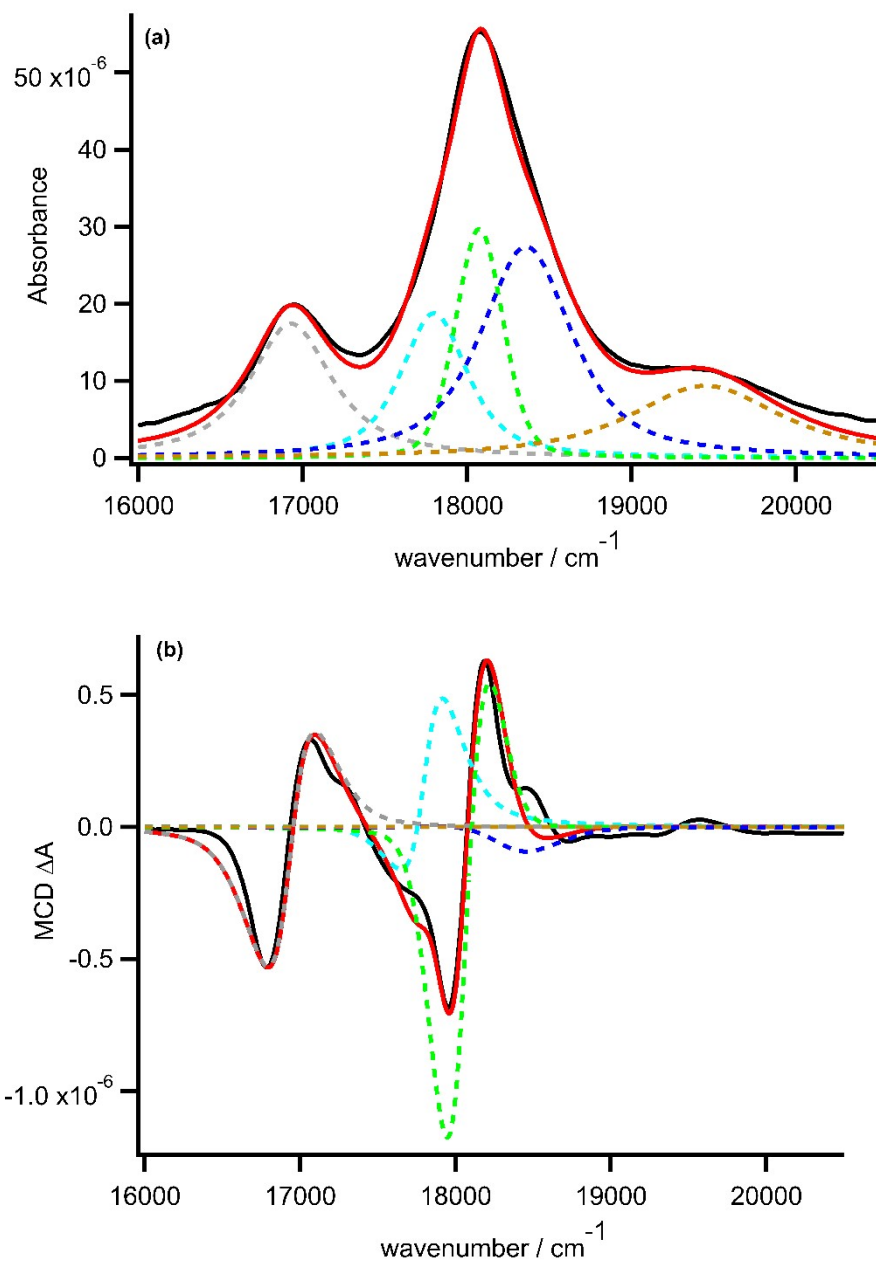

**Figure S16.** Band deconvolution of absorption (a) and MCD (b) of Q(0,0) and Q(1,0) bands spectra [Tb(TPP)(12C4)]Cl at 1.5 K and 1 T. Experimental spectra is shown in black while simulated band is in red color. The components that give the simulated band are in dashed lines.

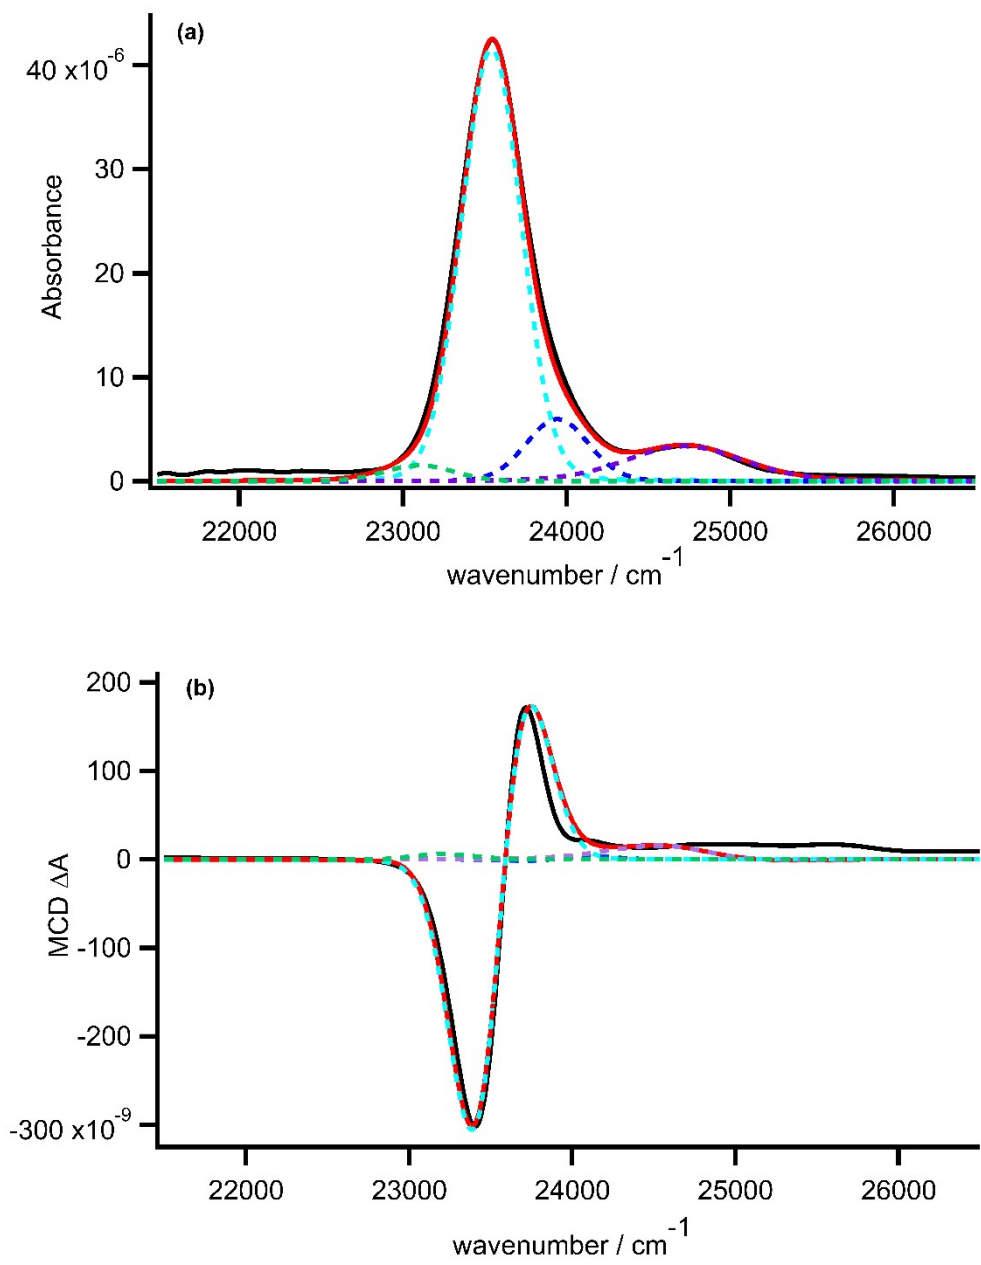

**Figure S17.** Band deconvolution of absorption (a) and MCD (b) of B(0,0) band spectra [Tb(TPP)(aza12C4)]Cl at 1.5 K and 1 T. Experimental spectra is shown in black while simulated band is in red color. The components that give the simulated band are in dashed lines.

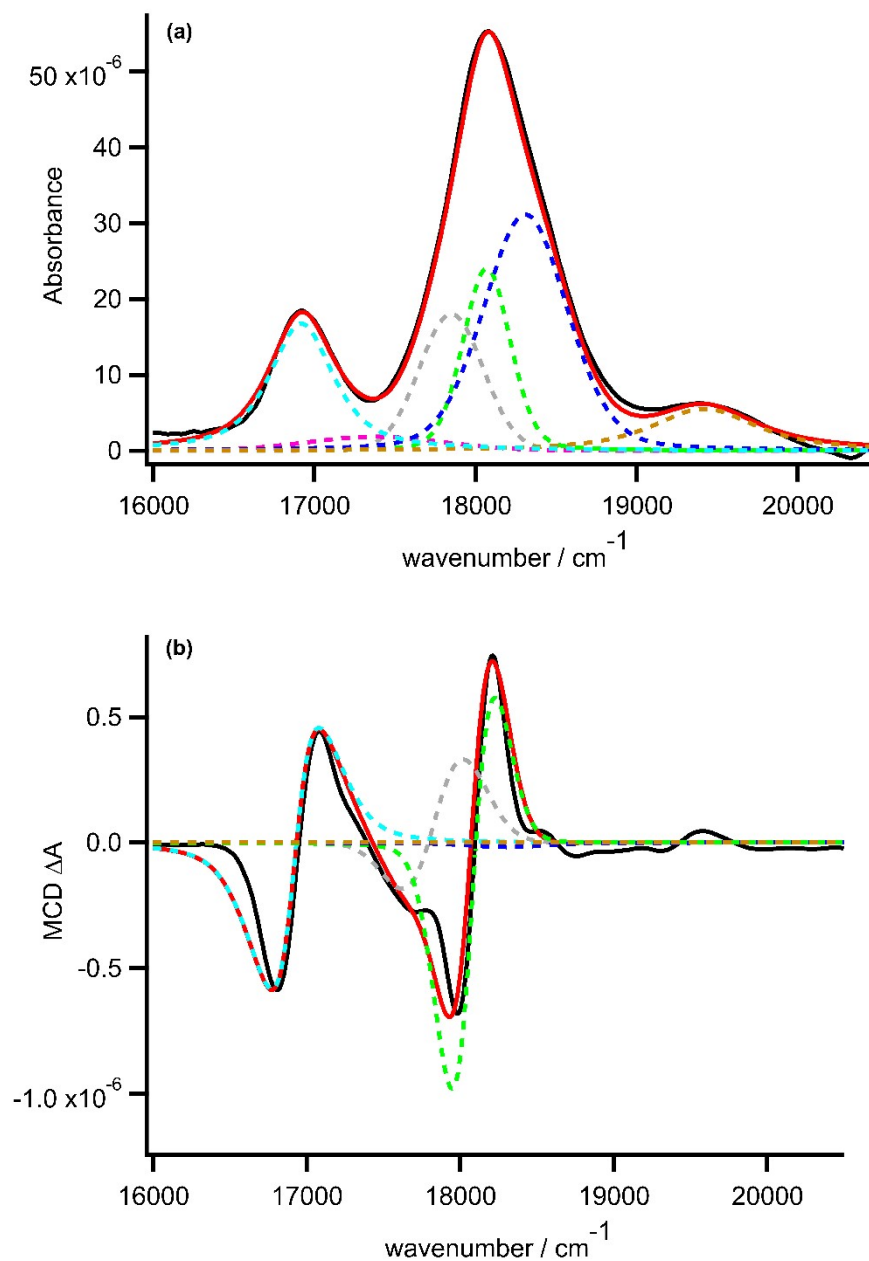

**Figure S18.** Band deconvolution of absorption (a) and MCD (b) of Q(0,0) and Q(1,0) bands spectra  $[\text{Tb}(\text{TPP})(\text{aza12C4})\text{Cl}]$  at 1.5 K and 1 T. Experimental spectra is shown in black while simulated band is in red color. The components that give the simulated band are in dashed lines.



**Table S1.** Parameters of B and Q bands determined by the band deconvolution of absorption and MCD spectra of [Y(TPP)(12C4)]Cl incorporated into PMMA.

|                                           |                                | Q band  |         |          |          |         | B band   |          |          |         |
|-------------------------------------------|--------------------------------|---------|---------|----------|----------|---------|----------|----------|----------|---------|
|                                           |                                | Band 1  | Band 2  | Band 3   | Band 4   | Band 5  | Band 6   | Band 7   | Band 8   | Band 9  |
| $E_0$ (cm <sup>-1</sup> ) <sup>§</sup>    |                                | 16930   | 17800   | 18075    | 18360    | 19450   | 23522    | 23905    | 24200    | 24700   |
| $\Gamma$ (cm <sup>-1</sup> ) <sup>§</sup> |                                | 600     | 480     | 340      | 660      | 1100    | 431      | 390      | 500      | 910     |
| $\eta^{\ddagger}$                         |                                | 0.89    | 0.76    | 0.31     | 0.78     | 0.89    | 0.08     | 0.00     | 0.50     | 0.30    |
| $D_0$                                     |                                | 0.62    | 0.51    | 0.47     | 1.03     | 0.62    | 21.56    | 4.02     | 0.26     | 2.78    |
| <i>Values obtained under 1 T</i>          |                                |         |         |          |          |         |          |          |          |         |
| T (K)                                     |                                | Band 1  | Band 2  | Band 3   | Band 4   | Band 5  | Band 6   | Band 7   | Band 8   | Band 9  |
| 100                                       | A <sub>1</sub> /D <sub>0</sub> | 3.26451 | 2.06186 | 2.32179  | 0.1946   | 0.00000 | 0.52240  | 0.05827  | -3.90625 | 0.35997 |
|                                           | B <sub>0</sub> /D <sub>0</sub> | 0.00048 | 0.00434 | -0.00300 | -0.00165 | 0.00000 | -0.00037 | 0.00099  | 0.02148  | 0.00000 |
| 1.5                                       | A <sub>1</sub> /D <sub>0</sub> | 3.41342 | 2.06186 | 2.33863  | 0.19461  | 0.00000 | 0.54039  | 0.54039  | -3.90625 | 0.35997 |
|                                           | B <sub>0</sub> /D <sub>0</sub> | 0.00016 | 0.00389 | -0.00383 | -0.00097 | 0.00000 | -0.00045 | -0.00045 | 0.02148  | 0.00000 |
| <i>Values obtained at 1.5 K</i>           |                                |         |         |          |          |         |          |          |          |         |
| B (T)                                     |                                | Band 1  | Band 2  | Band 3   | Band 4   | Band 5  | Band 6   | Band 7   | Band 8   | Band 9  |
| 1                                         | A <sub>1</sub> /D <sub>0</sub> | 3.41342 | 2.06186 | 2.33863  | 0.19461  | 0.00000 | 0.54039  | 0.54039  | -3.90625 | 0.35997 |
|                                           | B <sub>0</sub> /D <sub>0</sub> | 0.00016 | 0.00389 | -0.00383 | -0.00097 | 0.00000 | -0.00045 | -0.00045 | 0.02148  | 0.00000 |
| 2                                         | A <sub>1</sub> /D <sub>0</sub> | 3.35761 | 2.06186 | 2.35734  | 0.19461  | 0.00000 | 0.543323 | 0.05827  | -7.8125  | 0.28797 |
|                                           | B <sub>0</sub> /D <sub>0</sub> | 0.00024 | 0.00437 | -0.00321 | 0.00000  | 0.00000 | -0.00037 | 0.00049  | 0.01738  | 0.00000 |
| 3                                         | A <sub>1</sub> /D <sub>0</sub> | 3.35761 | 2.06186 | 2.06186  | 0.19461  | 0.00000 | 0.54332  | 0.05827  | -3.90625 | 0.43196 |
|                                           | B <sub>0</sub> /D <sub>0</sub> | 0.00024 | 0.00437 | 0.00437  | 0.00000  | 0.00000 | -0.00037 | 0.00074  | 0.02519  | 0.00000 |
| 4                                         | A <sub>1</sub> /D <sub>0</sub> | 3.35761 | 2.06186 | 2.34284  | 0.19461  | 0.00000 | 0.54332  | 0.05827  | -3.90625 | 0.35997 |
|                                           | B <sub>0</sub> /D <sub>0</sub> | 0.00080 | 0.00437 | -0.00301 | 0.00000  | 0.00000 | -0.00037 | 0.00074  | 0.02519  | 0.00000 |
| 5                                         | A <sub>1</sub> /D <sub>0</sub> | 3.35761 | 2.06186 | 2.34284  | 0.19461  | 0.00000 | 0.54332  | 0.05827  | -3.90625 | 0.35997 |
|                                           | B <sub>0</sub> /D <sub>0</sub> | 0.00080 | 0.00437 | -0.00301 | 0.00000  | 0.00000 | -0.00037 | 0.00099  | 0.02556  | 0.00000 |
| 6                                         | A <sub>1</sub> /D <sub>0</sub> | 3.35762 | 2.06186 | 2.34284  | 0.19461  | 0.00000 | 0.54332  | 0.05827  | -3.90625 | 0.35997 |
|                                           | B <sub>0</sub> /D <sub>0</sub> | 0.00080 | 0.00433 | -0.00301 | 0.00000  | 0.00000 | -0.00037 | 0.00099  | 0.02148  | 0.00000 |

**Table S2.** Parameters of B and Q bands determined by the band deconvolution of absorption and MCD spectra of [Y(TPP)(aza12C4)]Cl incorporated into PMMA.

|                                           |           | Q band   |         |         |         |         | B band  |         |          |         |          |
|-------------------------------------------|-----------|----------|---------|---------|---------|---------|---------|---------|----------|---------|----------|
|                                           |           | Band 1   | Band 2  | Band 3  | Band 4  | Band 5  | Band 6  | Band 7  | Band 8   | Band 9  | Band 10  |
| $E_0$ (cm <sup>-1</sup> ) <sup>§</sup>    |           | 16890    | 17130   | 17790   | 18045   | 18320   | 19540   | 23305   | 23650    | 23975   | 24400    |
| $\Gamma$ (cm <sup>-1</sup> ) <sup>§</sup> |           | 400      | 350     | 335     | 370     | 575     | 990     | 400     | 477      | 410     | 800      |
| $\eta^{\ddagger}$                         |           | 0.79     | 0.55    | 0.89    | 0.51    | 0.71    | 0.60    | 0.10    | 0.50     | 0.78    | 0.13     |
| $D_0$                                     |           | 0.29     | 0.15    | 0.17    | 0.48    | 1.38    | 0.26    | 1.05    | 7.64     | 23.02   | 4.00     |
| <i>Values obtained under 1 T</i>          |           |          |         |         |         |         |         |         |          |         |          |
| T (K)                                     |           | Band 1   | Band 2  | Band 3  | Band 4  | Band 5  | Band 6  | Band 7  | Band 8   | Band 9  | Band 10  |
| 100                                       | $A_1/D_0$ | 3.43126  | 2.06379 | 1.43374 | 2.15542 | 1.44822 | 0.00000 | 1.09227 | 0.55465  | 0.58564 | -0.50000 |
|                                           | $B_0/D_0$ | -0.00259 | 0.00884 | 0.00584 | 0.00000 | 0.00058 | 0.00000 | 0.00287 | -0.00200 | 0.00037 | -0.00025 |
| 1.5                                       | $A_1/D_0$ | 3.49975  | 2.41429 | 1.43374 | 2.15542 | 1.43374 | 0.00000 | 1.76561 | 0.55465  | 0.60677 | -0.50000 |
|                                           | $B_0/D_0$ | -0.00293 | 0.00816 | 0.00000 | 0.00055 | 0.00066 | 0.00000 | 0.00494 | -0.00200 | 0.00038 | -0.00025 |
| <i>Values obtained at 1.5 K</i>           |           |          |         |         |         |         |         |         |          |         |          |
| B (T)                                     |           | Band 1   | Band 2  | Band 3  | Band 4  | Band 5  | Band 6  | Band 7  | Band 8   | Band 9  | Band 10  |
| 1                                         | $A_1/D_0$ | 3.49975  | 2.41429 | 1.43374 | 2.15542 | 1.43374 | 0.00000 | 1.76561 | 0.55465  | 0.60677 | -0.50000 |
|                                           | $B_0/D_0$ | -0.00293 | 0.00816 | 0.00000 | 0.00055 | 0.00066 | 0.00000 | 0.00494 | -0.00200 | 0.00038 | -0.00025 |
| 2                                         | $A_1/D_0$ | 3.49975  | 2.41429 | 1.43374 | 2.15542 | 1.43374 | 0.00000 | 1.43085 | 0.55465  | 0.60465 | -0.50000 |
|                                           | $B_0/D_0$ | -0.00293 | 0.00816 | 0.00000 | 0.00055 | 0.00066 | 0.00000 | 0.00430 | -0.00200 | 0.00048 | -0.00025 |
| 3                                         | $A_1/D_0$ | 3.49975  | 2.41429 | 1.43374 | 2.15542 | 1.43374 | 0.00000 | 1.44424 | 0.55465  | 0.60465 | -0.50000 |
|                                           | $B_0/D_0$ | -0.00201 | 0.00816 | 0.00000 | 0.00055 | 0.00066 | 0.00000 | 0.00316 | -0.00200 | 0.00036 | -0.00025 |
| 4                                         | $A_1/D_0$ | 3.49975  | 2.41429 | 1.43374 | 2.15542 | 1.43374 | 0.00000 | 1.20513 | 0.55465  | 0.60465 | -0.50000 |
|                                           | $B_0/D_0$ | -0.00201 | 0.00816 | 0.00000 | 0.00055 | 0.00066 | 0.00000 | 0.00287 | -0.00200 | 0.00041 | -0.00025 |
| 5                                         | $A_1/D_0$ | 3.49975  | 2.41429 | 1.43374 | 2.15542 | 1.43374 | 0.00000 | 1.49742 | 0.55465  | 0.60465 | -0.50000 |
|                                           | $B_0/D_0$ | -0.00201 | 0.00748 | 0.00000 | 0.00055 | 0.00066 | 0.00000 | 0.00434 | -0.00200 | 0.00043 | -0.00025 |
| 6                                         | $A_1/D_0$ | 3.49975  | 2.41429 | 2.15542 | 1.43374 | 1.43374 | 0.00000 | 1.28739 | 0.55465  | 0.60465 | -0.50000 |
|                                           | $B_0/D_0$ | -0.00201 | 0.00748 | 0.00031 | 0.00000 | 0.00066 | 0.00000 | 0.00191 | -0.00200 | 0.00037 | -0.00025 |

**Table S3.** Parameters of B and Q bands determined by the band deconvolution of absorption and MCD spectra of [Tb(TPP)(12C4)]Cl incorporated into PMMA.

|                                           |           | Q band   |          |          |          |         | B band   |          |           |          |
|-------------------------------------------|-----------|----------|----------|----------|----------|---------|----------|----------|-----------|----------|
|                                           |           | Band 1   | Band 2   | Band 3   | Band 4   | Band 5  | Band 6   | Band 7   | Band 8    | Band 9   |
| $E_0$ (cm <sup>-1</sup> ) <sup>§</sup>    |           | 16935    | 17810    | 18060    | 18330    | 19450   | 23522    | 23905    | 24200     | 24710    |
| $\Gamma$ (cm <sup>-1</sup> ) <sup>§</sup> |           | 463      | 410      | 340      | 580      | 700     | 431      | 353      | 500       | 840      |
| $\eta^{\ddagger}$                         |           | 0.78     | 0.86     | 0.32     | 0.41     | 0.90    | 0.08     | 0.00     | 0.00      | 0.3      |
| $D_0$                                     |           | 0.49     | 0.39     | 0.57     | 0.95     | 0.20    | 24.51    | 3.15     | 0.76      | 4.88     |
| <i>Values obtained under 1 T</i>          |           |          |          |          |          |         |          |          |           |          |
| T (K)                                     |           | Band 1   | Band 2   | Band 3   | Band 4   | Band 5  | Band 6   | Band 7   | Band 8    | Band 9   |
| 100                                       | $A_1/D_0$ | 4.17493  | 4.12796  | 3.30086  | 0.22681  | 0.00000 | 0.66040  | 0.31723  | -3.07275  | 0.20501  |
|                                           | $B_0/D_0$ | 0.00000  | 0.01565  | -0.00763 | -0.00311 | 0.00000 | 0.00075  | -0.00317 | 0.01568   | 0.00000  |
| 1.5                                       | $A_1/D_0$ | 19.33305 | 14.25014 | 13.23885 | -1.0543  | 0.00000 | 3.14332  | 1.26895  | -13.22751 | 0.20501  |
|                                           | $B_0/D_0$ | -0.01511 | 0.02982  | -0.03296 | -0.00297 | 0.00000 | -0.00403 | -0.01972 | 0.01323   | 0.00000  |
| <i>Values obtained at 1.5 K</i>           |           |          |          |          |          |         |          |          |           |          |
| B (T)                                     |           | Band 1   | Band 2   | Band 3   | Band 4   | Band 5  | Band 6   | Band 7   | Band 8    | Band 9   |
| 1                                         | $A_1/D_0$ | 19.33305 | 14.25014 | 13.23885 | -1.0543  | 0.00000 | 3.14332  | 1.26895  | -13.22751 | 0.20501  |
|                                           | $B_0/D_0$ | -0.01511 | 0.02982  | -0.03296 | -0.00297 | 0.00000 | -0.00403 | -0.01972 | 0.01323   | 0.00000  |
| 2                                         | $A_1/D_0$ | 12.33618 | 9.20003  | 8.52986  | -1.05429 | 0.00000 | 1.96002  | -0.11103 | 1.32275   | -0.41002 |
|                                           | $B_0/D_0$ | -0.00832 | 0.02983  | -0.02419 | -0.00297 | 0.00000 | -0.00235 | -0.00415 | 0.02622   | 0.00000  |
| 3                                         | $A_1/D_0$ | 9.134167 | 7.89442  | 6.85377  | -1.05429 | 0.00000 | 1.44031  | -0.11103 | -1.32275  | -0.41002 |
|                                           | $B_0/D_0$ | -0.00491 | 0.02858  | -0.01995 | -0.00297 | 0.00000 | -0.00162 | -0.00101 | 0.02411   | 0.00000  |
| 4                                         | $A_1/D_0$ | 7.78777  | 5.36936  | 5.59515  | -1.05429 | 0.00000 | 1.23627  | -0.11103 | -2.64550  | -0.41002 |
|                                           | $B_0/D_0$ | -0.00457 | 0.01848  | -0.01427 | -0.00297 | 0.00000 | -0.00130 | -0.00101 | 0.01719   | 0.00000  |
| 5                                         | $A_1/D_0$ | 7.09438  | 5.36936  | 5.06911  | -1.05429 | 0.00000 | 1.11384  | -0.11103 | -2.64550  | -0.41002 |
|                                           | $B_0/D_0$ | -0.00375 | 0.01776  | -0.01469 | -0.00125 | 0.00000 | -0.00095 | -0.00101 | 0.01719   | 0.00000  |
| 6                                         | $A_1/D_0$ | 6.48245  | 5.36936  | 4.54305  | -1.05429 | 0.00000 | 1.03223  | -0.11103 | -1.32275  | -0.41002 |
|                                           | $B_0/D_0$ | -0.00242 | 0.01776  | -0.01469 | -0.00125 | 0.00000 | -0.00081 | -0.00101 | 0.01362   | 0.00000  |

**Table S4.** Parameters of B and Q bands determined by the band deconvolution of absorption and MCD spectra of [Tb(TPP)(aza12C4)]Cl incorporated into PMMA.

|                                           |           | Q band   |         |         |          |          | B band  |          |          |         |          |
|-------------------------------------------|-----------|----------|---------|---------|----------|----------|---------|----------|----------|---------|----------|
|                                           |           | Band 1   | Band 2  | Band 3  | Band 4   | Band 5   | Band 6  | Band 7   | Band 8   | Band 9  | Band 10  |
| $E_0$ (cm <sup>-1</sup> ) <sup>§</sup>    |           | 16920    | 17380   | 17850   | 18070    | 18310    | 19420   | 23100    | 23542    | 23945   | 24720    |
| $\Gamma$ (cm <sup>-1</sup> ) <sup>§</sup> |           | 474      | 1000    | 465     | 345      | 614      | 770     | 500      | 430      | 450     | 840      |
| $\eta^{\ddagger}$                         |           | 0.78     | 0.10    | 0.03    | 0.25     | 0.28     | 0.83    | 0.00     | 0.08     | 0.10    | 0.27     |
| $D_0$                                     |           | 0.49     | 0.09    | 0.39    | 0.42     | 0.98     | 0.27    | 1.00     | 24.15    | 3.65    | 4.08     |
| <i>Values obtained under 1 T</i>          |           |          |         |         |          |          |         |          |          |         |          |
| T (K)                                     |           | Band 1   | Band 2  | Band 3  | Band 4   | Band 5   | Band 6  | Band 7   | Band 8   | Band 9  | Band 10  |
| 100                                       | $A_1/D_0$ | 4.58032  | 0.00000 | 4.51085 | 4.21337  | 0.00000  | 0.00000 | 0.50000  | 0.62048  | 0.09404 | 0.02452  |
|                                           | $B_0/D_0$ | 0.00238  | 0.00000 | 0.01693 | -0.01639 | -0.00119 | 0.00000 | -0.00400 | -0.00034 | 0.50000 | 0.00000  |
| 1.5                                       | $A_1/D_0$ | 24.18027 | 0.00000 | 9.78821 | 17.10965 | 0.00000  | 0.00000 | 1.00000  | 3.68446  | 0.27375 | -2.35715 |
|                                           | $B_0/D_0$ | -0.01136 | 0.00000 | 0.01440 | -0.02833 | -0.00119 | 0.00000 | 0.00700  | -0.00556 | 1.00000 | 0.00785  |
| <i>Values obtained at 1.5 K</i>           |           |          |         |         |          |          |         |          |          |         |          |
| B (T)                                     |           | Band 1   | Band 2  | Band 3  | Band 4   | Band 5   | Band 6  | Band 7   | Band 8   | Band 9  | Band 10  |
| 1                                         | $A_1/D_0$ | 24.18027 | 0.00000 | 9.78821 | 17.10965 | 0.00000  | 0.00000 | 1.00000  | 3.68446  | 0.27375 | -2.35715 |
|                                           | $B_0/D_0$ | -0.01136 | 0.00000 | 0.01440 | -0.02833 | -0.00119 | 0.00000 | 0.00700  | -0.00556 | 1.00000 | 0.00785  |
| 2                                         | $A_1/D_0$ | 14.59789 | 0.00000 | 7.26315 | 10.99485 | 0.00000  | 0.00000 | 0.00000  | 2.20465  | 0.18459 | -0.39531 |
|                                           | $B_0/D_0$ | 0.00472  | 0.00000 | 0.01440 | -0.01888 | -0.00184 | 0.00000 | -0.00600 | -0.00271 | 0.00000 | 0.00245  |
| 3                                         | $A_1/D_0$ | 10.93451 | 0.00000 | 5.77642 | 8.65523  | 0.00000  | 0.00000 | 0.00000  | 1.66635  | 0.20345 | -0.39531 |
|                                           | $B_0/D_0$ | -0.00228 | 0.00000 | 0.01440 | -0.01725 | -0.00184 | 0.00000 | -0.00600 | -0.00193 | 0.00000 | 0.00245  |
| 4                                         | $A_1/D_0$ | 9.19401  | 0.00000 | 5.37525 | 7.48263  | 0.00000  | 0.00000 | 0.00000  | 1.40454  | 0.21899 | -0.39531 |
|                                           | $B_0/D_0$ | -0.00061 | 0.00000 | 0.01440 | -0.01661 | -0.00119 | 0.00000 | -0.00600 | -0.00151 | 0.00000 | 0.00245  |
| 5                                         | $A_1/D_0$ | 8.12400  | 0.00000 | 5.08262 | 6.84545  | 0.00000  | 0.00000 | 0.00000  | 1.25295  | 0.16425 | -0.39531 |
|                                           | $B_0/D_0$ | 0.00069  | 0.00000 | 0.01440 | -0.01661 | -0.00119 | 0.00000 | -0.00600 | -0.00118 | 0.00000 | 0.00245  |
| 6                                         | $A_1/D_0$ | 7.42056  | 0.00000 | 4.83012 | 6.41835  | 0.00000  | 0.00000 | 0.00000  | 1.15609  | 0.13687 | -0.39531 |
|                                           | $B_0/D_0$ | 0.00131  | 0.00000 | 0.01440 | -0.01661 | -0.00119 | 0.00000 | -0.00600 | -0.00103 | 0.00000 | 0.00245  |

## Computational Chemistry Calculation

**Table S5.** The description of Basis Sets for calculation of the [Ln(TPP)L]Cl (Ln = Y and Tb; L = (12C4 and aza12C4) complexes.

| <i>Basis Set 1</i>        | <i>Basis Set 2</i>      |
|---------------------------|-------------------------|
| Tb.ANO-RCC...8s7p5d3f2g1h | Tb.ANO-RCC...7s6p4d2f1g |
| Y. ANO-RCC...7s6p4d2f1g   | Y. ANO-RCC...6s5p3d1f   |
| C.ANO-RCC...2s1p          | C.ANO-RCC...2s1p        |
| N.ANO-RCC...2s1p          | N.ANO-RCC...2s1p        |
| O.ANO-RCC...2s1p          | O.ANO-RCC...2s1p        |
| H.ANO-RCC...1s            | H.ANO-RCC...1s          |

**Table S6.** Dipole transition strengths for [Y(TPP)(12C4)]<sup>+</sup> obtained from RASSCF/RASSI/single\_aniso calculations.

| <b>Basis Set 1</b> |    |                       |                                           |                      |                       |                              |
|--------------------|----|-----------------------|-------------------------------------------|----------------------|-----------------------|------------------------------|
| From               | To | Oscillator Strength   | Einstein Coefficient (sec <sup>-1</sup> ) |                      |                       | Total A (sec <sup>-1</sup> ) |
|                    |    |                       | A <sub>x</sub>                            | A <sub>y</sub>       | A <sub>z</sub>        |                              |
| 1                  | 2  | 2.79×10 <sup>-4</sup> | 2.01×10 <sup>2</sup>                      | 1.26×10 <sup>5</sup> | 2.11×10 <sup>2</sup>  | 1.26×10 <sup>5</sup>         |
| 1                  | 3  | 2.50×10 <sup>-4</sup> | 1.12×10 <sup>5</sup>                      | 9.88×10 <sup>1</sup> | 6.73×10 <sup>2</sup>  | 1.13×10 <sup>5</sup>         |
| 1                  | 4  | 5.45                  | 3.76×10 <sup>8</sup>                      | 7.78×10 <sup>9</sup> | 5.35×10 <sup>-1</sup> | 8.16×10 <sup>9</sup>         |
| 1                  | 5  | 5.45                  | 7.80×10 <sup>9</sup>                      | 3.77×10 <sup>8</sup> | 4.53×10 <sup>2</sup>  | 8.18×10 <sup>9</sup>         |
| 2                  | 4  | 4.91×10 <sup>-4</sup> | 1.02×10 <sup>5</sup>                      | 5.34×10 <sup>2</sup> | 4.71×10 <sup>4</sup>  | 1.49×10 <sup>5</sup>         |
| 2                  | 5  | 4.69×10 <sup>-4</sup> | 1.21×10 <sup>2</sup>                      | 1.26×10 <sup>5</sup> | 1.73×10 <sup>4</sup>  | 1.43×10 <sup>5</sup>         |
| 3                  | 4  | 5.14×10 <sup>-4</sup> | 7.06                                      | 1.39×10 <sup>5</sup> | 1.72×10 <sup>4</sup>  | 1.56×10 <sup>5</sup>         |
| 3                  | 5  | 4.92×10 <sup>-4</sup> | 1.04×10 <sup>5</sup>                      | 3.53×10 <sup>1</sup> | 4.64×10 <sup>4</sup>  | 1.50×10 <sup>5</sup>         |
| <b>Basis Set 2</b> |    |                       |                                           |                      |                       |                              |
| From               | To | Oscillator Strength   | Einstein Coefficient (sec <sup>-1</sup> ) |                      |                       | Total A (sec <sup>-1</sup> ) |
|                    |    |                       | A <sub>x</sub>                            | A <sub>y</sub>       | A <sub>z</sub>        |                              |
| 1                  | 2  | 1.77×10 <sup>4</sup>  | 1.02×10 <sup>4</sup>                      | 7.18×10 <sup>4</sup> | 3.55×10 <sup>2</sup>  | 8.24×10 <sup>4</sup>         |
| 1                  | 3  | 1.59×10 <sup>4</sup>  | 6.64×10 <sup>4</sup>                      | 7.74×10 <sup>3</sup> | 1.77                  | 7.41×10 <sup>4</sup>         |
| 1                  | 4  | 5.49                  | 5.52×10 <sup>9</sup>                      | 2.83×10 <sup>9</sup> | 7.83×10 <sup>-1</sup> | 8.35×10 <sup>9</sup>         |
| 1                  | 5  | 5.49                  | 2.83×10 <sup>9</sup>                      | 5.53×10 <sup>9</sup> | 2.04×10 <sup>2</sup>  | 8.36×10 <sup>9</sup>         |
| 2                  | 4  | 1.81×10 <sup>-4</sup> | 1.17×10 <sup>4</sup>                      | 4.23×10 <sup>4</sup> | 1.05×10 <sup>3</sup>  | 5.50×10 <sup>4</sup>         |
| 2                  | 5  | 4.00×10 <sup>-4</sup> | 4.94×10 <sup>4</sup>                      | 1.55×10 <sup>4</sup> | 5.66×10 <sup>4</sup>  | 1.21×10 <sup>5</sup>         |
| 3                  | 4  | 4.17×10 <sup>-4</sup> | 5.17×10 <sup>4</sup>                      | 1.83×10 <sup>4</sup> | 5.65×10 <sup>4</sup>  | 1.26×10 <sup>5</sup>         |
| 3                  | 5  | 1.73×10 <sup>-4</sup> | 1.27×10 <sup>4</sup>                      | 3.88×10 <sup>4</sup> | 1.04×10 <sup>3</sup>  | 5.25×10 <sup>4</sup>         |

**Table S7.** Low-Lying Spin Orbit of  $[Y(PPP)(12C4)]^+$  obtained from RASSCF/RASSI/single\_aniso calculations.

| Basis Set 1 |                            |                |                |                |                |                |
|-------------|----------------------------|----------------|----------------|----------------|----------------|----------------|
| S.O states  | Energy (cm <sup>-1</sup> ) | g <sub>z</sub> | g <sub>x</sub> | g <sub>y</sub> | L <sub>z</sub> | S <sub>z</sub> |
| 1           | 0.00                       | -              | -              | -              | -              |                |
| 2           | 26049.06005                | 8.14           | 0.00           | 0.00           | 4.07           | 0.00           |
| 3           | 26051.51537                |                |                |                |                |                |
| 4           | 47392.89823                | 0.36           | 0.00           | 0.00           | 0.18           | 0.00           |
| 5           | 47431.70499                |                |                |                |                |                |
| Basis Set 2 |                            |                |                |                |                |                |
| S.O states  | Energy (cm <sup>-1</sup> ) | g <sub>z</sub> | g <sub>x</sub> | g <sub>y</sub> | L <sub>z</sub> | S <sub>z</sub> |
| 1           | 0.00                       | -              | -              | -              | -              | -              |
| 2           | 26431.10                   | 8.11           | 0.00           | 0.00           | 4.05           | 0.00           |
| 3           | 26431.65                   |                |                |                |                |                |
| 4           | 47760.09                   | 0.33           | 0.00           | 0.00           | 0.16           | 0.00           |
| 5           | 47777.50                   |                |                |                |                |                |

**Table S8.** Dipole transition strengths for  $[Y(PPP)(aza12C4)]^+$  obtained from RASSCF/RASSI/single\_aniso calculations.

| Basis Set 1 |    |                       |                                           |                      |                       |                              |
|-------------|----|-----------------------|-------------------------------------------|----------------------|-----------------------|------------------------------|
| From        | To | Oscillator Strength   | Einstein Coefficient (sec <sup>-1</sup> ) |                      |                       | Total A (sec <sup>-1</sup> ) |
|             |    |                       | A <sub>x</sub>                            | A <sub>y</sub>       | A <sub>z</sub>        |                              |
| 1           | 2  | 2.24×10 <sup>-3</sup> | 4.20×10 <sup>5</sup>                      | 5.91×10 <sup>5</sup> | 3.43                  | 1.01×10 <sup>6</sup>         |
| 1           | 3  | 7.59×10 <sup>-4</sup> | 8.03×10 <sup>1</sup>                      | 3.44×10 <sup>5</sup> | 4.11                  | 3.44×10 <sup>5</sup>         |
| 1           | 4  | 5.44                  | 4.78×10 <sup>9</sup>                      | 3.28×10 <sup>9</sup> | 4.05×10 <sup>4</sup>  | 8.07×10 <sup>9</sup>         |
| 1           | 5  | 5.44                  | 3.30×10 <sup>9</sup>                      | 4.79×10 <sup>9</sup> | 1.61×10 <sup>3</sup>  | 8.09×10 <sup>9</sup>         |
| 2           | 4  | 4.61×10 <sup>-3</sup> | 1.07×10 <sup>6</sup>                      | 1.87×10 <sup>5</sup> | 1.18×10 <sup>5</sup>  | 1.37×10 <sup>6</sup>         |
| 2           | 5  | 3.12×10 <sup>-3</sup> | 7.18×10 <sup>5</sup>                      | 2.07×10 <sup>5</sup> | 8.66×10 <sup>3</sup>  | 9.34×10 <sup>5</sup>         |
| 3           | 4  | 1.07×10 <sup>-3</sup> | 6.46×10 <sup>4</sup>                      | 2.37×10 <sup>5</sup> | 1.47×10 <sup>4</sup>  | 3.17×10 <sup>5</sup>         |
| 3           | 5  | 1.58×10 <sup>-3</sup> | 5.34×10 <sup>4</sup>                      | 3.81×10 <sup>5</sup> | 3.74×10 <sup>4</sup>  | 4.72×10 <sup>5</sup>         |
| Basis Set 2 |    |                       |                                           |                      |                       |                              |
| From        | To | Oscillator Strength   | Einstein Coefficient (sec <sup>-1</sup> ) |                      |                       | Total A (sec <sup>-1</sup> ) |
|             |    |                       | A <sub>x</sub>                            | A <sub>y</sub>       | A <sub>z</sub>        |                              |
| 1           | 2  | 1.95×10 <sup>-3</sup> | 1.33×10 <sup>5</sup>                      | 7.80×10 <sup>5</sup> | 2.50×10 <sup>3</sup>  | 9.16×10 <sup>5</sup>         |
| 1           | 3  | 5.68×10 <sup>-4</sup> | 1.83×10 <sup>4</sup>                      | 2.49×10 <sup>5</sup> | 5.44×10 <sup>2</sup>  | 2.67×10 <sup>5</sup>         |
| 1           | 4  | 5.42                  | 1.84×10 <sup>9</sup>                      | 6.33×10 <sup>9</sup> | 2.68E×10 <sup>4</sup> | 8.17×10 <sup>9</sup>         |
| 1           | 5  | 5.44                  | 6.40×10 <sup>9</sup>                      | 1.85×10 <sup>9</sup> | 5.89×10 <sup>3</sup>  | 8.26×10 <sup>9</sup>         |
| 2           | 4  | 2.53×10 <sup>-3</sup> | 6.50×10 <sup>5</sup>                      | 1.69×10 <sup>3</sup> | 9.30×10 <sup>4</sup>  | 7.45×10 <sup>5</sup>         |
| 2           | 5  | 1.09×10 <sup>-2</sup> | 3.21×10 <sup>6</sup>                      | 1.24×10 <sup>4</sup> | 3.37×10 <sup>4</sup>  | 3.26×10 <sup>6</sup>         |
| 3           | 4  | 1.74×10 <sup>-3</sup> | 3.60×10 <sup>5</sup>                      | 1.37×10 <sup>5</sup> | 1.36×10 <sup>4</sup>  | 5.11×10 <sup>5</sup>         |
| 3           | 5  | 3.58×10 <sup>-3</sup> | 3.53×10 <sup>4</sup>                      | 1.01×10 <sup>6</sup> | 2.53×10 <sup>4</sup>  | 1.07×10 <sup>6</sup>         |
| 4           | 5  | 9.92×10 <sup>-5</sup> | 7.58×10 <sup>-1</sup>                     | 1.65                 | 3.97×10 <sup>-8</sup> | 2.41                         |

**Table S9.** Low-Lying Spin Orbit of [Y(TPP)(aza12C4)]<sup>+</sup> obtained from RASSCF/RASSI/single\_aniso calculations

| Basis Set 1 |                            |                |                |                |                |                |
|-------------|----------------------------|----------------|----------------|----------------|----------------|----------------|
| S.O states  | Energy (cm <sup>-1</sup> ) | g <sub>z</sub> | g <sub>x</sub> | g <sub>y</sub> | L <sub>z</sub> | S <sub>z</sub> |
| 1           | 0.00                       | -              | -              | -              | -              | -              |
| 2           | 26030.76                   | 8.07           | 0.00           | 0.00           | 4.03           | 0.00           |
| 3           | 26063.59                   |                |                |                |                |                |
| 4           | 47151.07                   | 0.37           | 0.00           | 0.00           | 0.19           | 0.00           |
| 5           | 47212.79                   |                |                |                |                |                |
| Basis Set 2 |                            |                |                |                |                |                |
| S.O states  | Energy (cm <sup>-1</sup> ) | g <sub>z</sub> | g <sub>x</sub> | g <sub>y</sub> | L <sub>z</sub> | S <sub>z</sub> |
| 1           | 0.00                       | -              | -              | -              | -              | -              |
| 2           | 26525.77                   | 8.03           | 0.00           | 0.00           | 4.01           | 0.00           |
| 3           | 26566.83                   |                |                |                |                |                |
| 4           | 47524.82                   | 0.34           | 0.00           | 0.00           | 0.17           | 0.00           |
| 5           | 47715.52                   |                |                |                |                |                |

**Table S10.** Composition of wave functions for [Tb(TPP)(12C4)]<sup>+</sup> as extracted from RASSCF/RASSI/Single\_Aniso calculations with basis set 1.

| M <sub>J</sub> | Wave Functions and Energies |       |                          |       |                          |       |
|----------------|-----------------------------|-------|--------------------------|-------|--------------------------|-------|
|                | 1                           |       | 2                        |       | 3                        |       |
|                | 0.000 cm <sup>-1</sup>      |       | 0.179 cm <sup>-1</sup>   |       | 120.229 cm <sup>-1</sup> |       |
|                | c                           | c     | c                        | c     | c                        | c     |
| -6             | 0.391338-0.587270i          | 0.498 | 0.391800-0.587962i       | 0.499 | 0.000000                 | 0.000 |
| -5             | 0.000000                    | 0.000 | 0.000000                 | 0.000 | -0.282917+0.402093i      | 0.242 |
| -4             | 0.000000                    | 0.000 | 0.000000                 | 0.000 | 0.000000                 | 0.000 |
| -3             | 0.000000                    | 0.000 | 0.000000                 | 0.000 | 0.171332+0.176008i       | 0.060 |
| -2             | -0.039904-0.019410i         | 0.002 | -0.025332-0.012311i      | 0.001 | 0.000000                 | 0.000 |
| -1             | 0.000000                    | 0.000 | 0.000000                 | 0.000 | 0.413028+0.165389i       | 0.198 |
| 0              | 0.000000                    | 0.000 | 0.000000                 | 0.000 | 0.000000                 | 0.000 |
| 1              | 0.000000                    | 0.000 | 0.000000                 | 0.000 | 0.208420-0.393074i       | 0.198 |
| 2              | -0.005976+0.043970i         | 0.002 | 0.003802-0.027907i       | 0.001 | 0.000000                 | 0.000 |
| 3              | 0.000000                    | 0.000 | 0.000000                 | 0.000 | 0.017071-0.245035i       | 0.060 |
| 4              | 0.000000                    | 0.000 | 0.000000                 | 0.000 | 0.000000                 | 0.000 |
| 5              | 0.000000                    | 0.000 | 0.000000                 | 0.000 | -0.475719-0.124147i      | 0.242 |
| 6              | 0.705713                    | 0.498 | -0.706546                | 0.499 | 0.000000                 | 0.000 |
| M <sub>J</sub> | 4                           |       | 5                        |       | 6                        |       |
|                | 120.229 cm <sup>-1</sup>    |       | 127.393 cm <sup>-1</sup> |       | 136.541 cm <sup>-1</sup> |       |
|                | c                           | c     | c                        | c     | c                        | c     |
| -6             | 0.000000                    | 0.000 | 0.000000                 | 0.000 | 0.024656-0.036894i       | 0.002 |
| -5             | 0.373254-0.320004i          | 0.242 | 0.000000                 | 0.000 | 0.000000                 | 0.000 |
| -4             | 0.000000                    | 0.000 | 0.079033-0.405279i       | 0.170 | 0.000000                 | 0.000 |
| -3             | 0.122691+0.212791i          | 0.060 | 0.000000                 | 0.000 | 0.000000                 | 0.000 |
| -2             | 0.000000                    | 0.000 | 0.000000                 | 0.000 | 0.634192+0.309567i       | 0.498 |
| -1             | -0.359555-0.262042i         | 0.198 | 0.000000                 | 0.000 | 0.000000                 | 0.000 |
| 0              | 0.000001                    | 0.000 | -0.808278+0.075450i      | 0.659 | 0.000000                 | 0.000 |
| 1              | 0.298831-0.329615i          | 0.198 | 0.000000                 | 0.000 | 0.000000                 | 0.000 |
| 2              | 0.000000                    | 0.000 | 0.000000                 | 0.000 | 0.095004-0.699289i       | 0.498 |
| 3              | -0.076910+0.233277i         | 0.060 | 0.000000                 | 0.000 | 0.000000                 | 0.000 |
| 4              | 0.000000                    | 0.000 | 0.152676+0.383650i       | 0.170 | 0.000000                 | 0.000 |

|                |                          |       |                          |       |                          |       |
|----------------|--------------------------|-------|--------------------------|-------|--------------------------|-------|
| 5              | -0.430474-0.237514i      | 0.242 | 0.000000                 | 0.000 | 0.000000                 | 0.000 |
| 6              | 0.000000                 | 0.000 | 0.000000                 | 0.000 | 0.044374                 | 0.002 |
| M <sub>J</sub> | <b>7</b>                 |       | <b>8</b>                 |       | <b>9</b>                 |       |
|                | 154.392 cm <sup>-1</sup> |       | 154.392 cm <sup>-1</sup> |       | 194.587 cm <sup>-1</sup> |       |
|                | c                        | c     | c                        | c     | c                        | c     |
| -6             | 0.000000                 | 0.000 | 0.000000                 | 0.000 | 0.000000                 | 0.000 |
| -5             | -0.446607-0.219440i      | 0.248 | 0.491260+0.079224i       | 0.248 | 0.000000                 | 0.000 |
| -4             | 0.000000                 | 0.000 | 0.000000                 | 0.000 | -0.614274+0.350239i      | 0.500 |
| -3             | 0.178587+0.310817i       | 0.129 | 0.261683+0.244994i       | 0.129 | 0.000000                 | 0.000 |
| -2             | 0.000000                 | 0.000 | 0.000000                 | 0.000 | 0.000000                 | 0.000 |
| -1             | 0.078387-0.343137i       | 0.124 | 0.025399+0.351059i       | 0.124 | 0.000000                 | 0.000 |
| 0              | 0.000000                 | 0.000 | 0.000000                 | 0.000 | 0.000151-0.000157i       | 0.000 |
| 1              | 0.236692-0.260508i       | 0.124 | 0.150151-0.318343i       | 0.124 | 0.000000                 | 0.000 |
| 2              | 0.000000                 | 0.000 | 0.000000                 | 0.000 | 0.000000                 | 0.000 |
| 3              | -0.357109+0.031205i      | 0.129 | 0.332368-0.134285i       | 0.129 | 0.000000                 | 0.000 |
| 4              | 0.000000                 | 0.000 | 0.000000                 | 0.000 | -0.326941+0.626984i      | 0.500 |
| 5              | 0.435391+0.240929i       | 0.248 | 0.486818+0.103054i       | 0.248 | 0.000000                 | 0.000 |
| 6              | 0.000000                 | 0.000 | 0.000000                 | 0.000 | 0.000000                 | 0.000 |
| M <sub>J</sub> | <b>10</b>                |       | <b>11</b>                |       | <b>12</b>                |       |
|                | 231.000 cm <sup>-1</sup> |       | 232.305 cm <sup>-1</sup> |       | 232.470 cm <sup>-1</sup> |       |
|                | c                        | c     | c                        | c     | c                        | c     |
| -6             | -0.015671+0.023403i      | 0.001 | 0.000000                 | 0.000 | 0.000000                 | 0.000 |
| -5             | 0.000001i                | 0.000 | 0.000006+0.000001i       | 0.000 | -0.094562+0.041536i      | 0.011 |
| -4             | 0.000002                 | 0.000 | 0.561081-0.121206i       | 0.330 | 0.000028-0.000004i       | 0.000 |
| -3             | 0.000002+0.000002i       | 0.000 | -0.000028+0.000017i      | 0.000 | 0.556609+0.036780i       | 0.311 |
| -2             | -0.634799-0.310221i      | 0.499 | 0.000002+0.000001i       | 0.000 | 0.000002+0.000001i       | 0.000 |
| -1             | -0.000002                | 0.000 | 0.000003+0.000025i       | 0.000 | -0.254357-0.336852i      | 0.178 |
| 0              | 0.000001+0.000001i       | 0.000 | 0.279385+0.512775i       | 0.341 | 0.000012+0.000026i       | 0.000 |
| 1              | -0.000001+0.000002i      | 0.000 | -0.000019-0.000016i      | 0.000 | 0.102615+0.409435i       | 0.178 |
| 2              | 0.095436-0.700071i       | 0.499 | 0.000002i                | 0.000 | -0.000001+0.000003i      | 0.000 |
| 3              | -0.000001-0.000003i      | 0.000 | -0.000030+0.000014i      | 0.000 | 0.320696-0.456421i       | 0.311 |
| 4              | -0.000001+0.000001i      | 0.000 | -0.406054+0.405737i      | 0.330 | -0.000021+0.000019i      | 0.000 |
| 5              | -0.000001                | 0.000 | 0.000003-0.000005i       | 0.000 | -0.091685+0.047552i      | 0.011 |
| 6              | 0.028165                 | 0.001 | 0.000000                 | 0.000 | 0.000000                 | 0.000 |
| M <sub>J</sub> | <b>13</b>                |       |                          |       |                          |       |
|                | 232.470 cm <sup>-1</sup> |       |                          |       |                          |       |
|                | c                        | c     |                          |       |                          |       |
| -6             | 0.000000                 | 0.000 |                          |       |                          |       |
| -5             | -0.048733-0.091062i      | 0.011 |                          |       |                          |       |
| -4             | 0.000018-0.000005i       | 0.000 |                          |       |                          |       |
| -3             | -0.006429-0.557786i      | 0.311 |                          |       |                          |       |
| -2             | -0.000002-0.000001i      | 0.000 |                          |       |                          |       |
| -1             | 0.316145-0.279676i       | 0.178 |                          |       |                          |       |
| 0              | 0.000009+0.000016i       | 0.000 |                          |       |                          |       |
| 1              | 0.400260-0.134010i       | 0.178 |                          |       |                          |       |
| 2              | 0.000000-0.000003i       | 0.000 |                          |       |                          |       |
| 3              | 0.479883+0.284391i       | 0.311 |                          |       |                          |       |
| 4              | -0.000013+0.000013i      | 0.000 |                          |       |                          |       |
| 5              | 0.054508+0.087727i       | 0.011 |                          |       |                          |       |
| 6              | 0.000000                 | 0.000 |                          |       |                          |       |



**Table S11.** Composition of wave functions for  $[\text{Tb}(\text{TPP})(12\text{C}4)]^+$  as extracted from RASSCF/RASSI/single\_Aniso calculations with basis set 2.

| $M_J$ | Wave Functions and Energies |                     |                          |                     |                          |                     |
|-------|-----------------------------|---------------------|--------------------------|---------------------|--------------------------|---------------------|
|       | 1                           |                     | 2                        |                     | 3                        |                     |
|       | 0.000 $\text{cm}^{-1}$      |                     | 0.105 $\text{cm}^{-1}$   |                     | 123.232 $\text{cm}^{-1}$ |                     |
|       | c                           | c                   | c                        | c                   | c                        | c                   |
| -6    | -0.514067-0.484233i         | 0.499               | -0.514415-0.484562i      | 0.499               | 0.000000                 | 0.000               |
| -5    | 0.000000                    | 0.000               | 0.000000                 | 0.000               | -0.324541-0.484521i      | 0.340               |
| -4    | -0.000002+0.000003i         | 0.000               | -0.000002+0.000003i      | 0.000               | 0.000000                 | 0.000               |
| -3    | 0.000000                    | 0.000               | 0.000000                 | 0.000               | -0.130626+0.124459i      | 0.033               |
| -2    | 0.029828+0.019086i          | 0.001               | 0.020241+0.012943i       | 0.001               | 0.000000                 | 0.000               |
| -1    | 0.000000                    | 0.000               | 0.000000                 | 0.000               | 0.275601+0.226724i       | 0.127               |
| 0     | -0.000001i                  | 0.000               | 0.000000                 | 0.000               | 0.000000                 | 0.000               |
| 1     | 0.000000                    | 0.000               | 0.000000                 | 0.000               | 0.149856-0.323887i       | 0.127               |
| 2     | -0.034799-0.006559i         | 0.001               | 0.023608+0.004457i       | 0.001               | 0.000000                 | 0.000               |
| 3     | 0.000000                    | 0.000               | 0.000000                 | 0.000               | -0.171704-0.055414i      | 0.033               |
| 4     | -0.000001+0.000004i         | 0.000               | 0.000001-0.000003i       | 0.000               | 0.000000                 | 0.000               |
| 5     | 0.000000                    | 0.000               | 0.000000                 | 0.000               | -0.082033+0.577372i      | 0.000               |
| 6     | 0.706220                    | 0.499               | -0.706699                | 0.499               | 0.000000                 | 0.000               |
| $M_J$ | 4                           |                     | 5                        |                     | 6                        |                     |
|       | 123.233 $\text{cm}^{-1}$    |                     | 135.406 $\text{cm}^{-1}$ |                     | 144.439 $\text{cm}^{-1}$ |                     |
|       | c                           | c                   | c                        | c                   | c                        | c                   |
|       | -6                          | 0.000000            | 0.000                    | -0.000001-0.000002i | 0.000                    | -0.025741-0.024318i |
| -5    | -0.115691-0.571583i         | 0.340               | 0.000000                 | 0.000               | 0.000000                 | 0                   |
| -4    | 0.000000                    | 0.000               | 0.322137-0.283850i       | 0.184               | 0.000004-0.000004i       | 0                   |
| -3    | 0.168153-0.065366i          | 0.033               | 0.000000                 | 0.000               | 0.000000                 | 0                   |
| -2    | 0.000000                    | 0.000               | 0.000001+0.000001i       | 0.000               | -0.594292-0.381527i      | 0.499               |
| -1    | 0.168560+0.314560i          | 0.127               | 0.000000                 | 0.000               | 0.000000                 | 0                   |
| 0     | 0.000000                    | 0.000               | -0.380484+0.697528i      | 0.631               | 0.000001-0.000003i       | 0                   |
| 1     | -0.261857+0.242468i         | 0.127               | 0.000000                 | 0.000               | 0.000000                 | 0                   |
| 2     | 0.000000                    | 0.000               | -0.000001-0.000001i      | 0.000               | 0.694004+0.130782i       | 0.499               |
| 3     | -0.137677-0.116590i         | 0.033               | 0.000000                 | 0.000               | 0.000000                 | 0                   |
| 4     | 0.000000                    | 0.000               | 0.064259-0.424516i       | 0.184               | 0.000000-0.000005i       | 0                   |
| 5     | 0.295623-0.502692i          | 0.340               | 0.000000                 | 0.000               | 0.000000                 | 0                   |
| 6     | 0.000000                    | 0.000               | 0.000003                 | 0.000               | 0.035411                 | 0.001               |
| $M_J$ | 7                           |                     | 8                        |                     | 9                        |                     |
|       | 154.526 $\text{cm}^{-1}$    |                     | 154.527 $\text{cm}^{-1}$ |                     | 189.843 $\text{cm}^{-1}$ |                     |
|       | c                           | c                   | c                        | c                   | c                        | c                   |
|       | -6                          | 0.000000            | 0.000                    | 0.000000            | 0.000                    | -0.000002-0.000003i |
| -5    | -0.446607-0.219440i         | 0.152               | -0.157096-0.356840i      | 0.152               | 0.000000                 | 0.000               |
| -4    | 0.000000                    | 0.000               | 0.000000                 | 0.000               | 0.524728-0.473984i       | 0.500               |
| -3    | 0.178587+0.310817i          | 0.157               | 0.339485-0.205395i       | 0.157               | 0.000000                 | 0.000               |
| -2    | 0.000000                    | 0.000               | 0.000000                 | 0.000               | -0.000009-0.000007i      | 0.000               |
| -1    | 0.078387-0.343137i          | 0.191               | -0.283479-0.331946i      | 0.191               | 0.000000                 | 0.000               |
| 0     | 0.000000                    | 0.000               | 0.000000                 | 0.000               | 0.000174+0.000092i       | 0.000               |
| 1     | 0.236692-0.260508i          | 0.191               | -0.264207+0.347482i      | 0.191               | 0.000000                 | 0.000               |
| 2     | 0.000000                    | 0.000               | 0.000000                 | 0.000               | -0.000011-0.000003i      | 0.000               |
| 3     | -0.357109+0.031205i         | 0.157               | 0.350582+0.185821i       | 0.157               | 0.000000                 | 0.000               |
| 4     | 0.000000                    | 0.000               | 0.000000                 | 0.000               | -0.096839+0.700444i      | 0.500               |
| 5     | 0.435391+0.240929i          | 0.152               | -0.136616+0.365171i      | 0.152               | 0.000000                 | 0.000               |
| 6     | 0.000000                    | 0.000               | 0.000000                 | 0.000               | -0.000004                | 0.000               |
| $M_J$ | 10                          |                     | 11                       |                     | 12                       |                     |
|       | 223.889 $\text{cm}^{-1}$    |                     | 226.431 $\text{cm}^{-1}$ |                     | 226.569 $\text{cm}^{-1}$ |                     |
|       | c                           | c                   | c                        | c                   | c                        | c                   |
|       | -6                          | -0.000002-0.000001i | 0.000                    | -0.017451-0.016513i | 0.001                    | 0.000000            |

|                |                          |       |                     |       |                     |       |
|----------------|--------------------------|-------|---------------------|-------|---------------------|-------|
| -5             | 0.000000                 | 0.000 | 0.000000            | 0.000 | 0.039130+0.079806i  | 0.008 |
| -4             | 0.356339-0.434373i       | 0.316 | -0.000014+0.000003i | 0.000 | 0.000000            | 0.000 |
| -3             | 0.000000                 | 0.000 | 0.000001-0.000001i  | 0.000 | -0.531900-0.164597i | 0.310 |
| -2             | 0.000012i                | 0.000 | -0.594540-0.382028i | 0.499 | -0.000001-0.000001i | 0.000 |
| -1             | 0.000000                 | 0.000 | 0.000000-0.000001i  | 0.000 | 0.290454+0.312612i  | 0.182 |
| 0              | 0.201053-0.572943i       | 0.369 | -0.000009-0.000004i | 0.000 | 0.000000            | 0.000 |
| 1              | 0.000000                 | 0.000 | 0.000001-0.000001i  | 0.000 | -0.425475+0.032566i | 0.182 |
| 2              | -0.000007+0.000010i      | 0.000 | -0.694422-0.131154i | 0.499 | -0.000001           | 0.000 |
| 3              | 0.000000                 | 0.000 | 0.000000-0.000001i  | 0.000 | 0.502410+0.239989i  | 0.310 |
| 4              | -0.006772-0.561793i      | 0.316 | -0.000008-0.000012i | 0.000 | 0.000000            | 0.000 |
| 5              | 0.000000                 | 0.000 | 0.000000            | 0.000 | -0.082894+0.032075i | 0.008 |
| 6              | 0.000002                 | 0.000 | -0.024025           | 0.001 | 0.000000            | 0.000 |
| M <sub>J</sub> | <b>13</b>                |       |                     |       |                     |       |
|                | 226.569 cm <sup>-1</sup> |       |                     |       |                     |       |
|                | c                        | c     |                     |       |                     |       |
| -6             | 0.000000                 | 0.000 |                     |       |                     |       |
| -5             | 0.079900-0.038921i       | 0.008 |                     |       |                     |       |
| -4             | 0.000000                 | 0.000 |                     |       |                     |       |
| -3             | 0.166020-0.531458i       | 0.310 |                     |       |                     |       |
| -2             | 0.000001+0.000001i       | 0.000 |                     |       |                     |       |
| -1             | 0.313391-0.289616i       | 0.182 |                     |       |                     |       |
| 0              | 0.000000                 | 0.000 |                     |       |                     |       |
| 1              | -0.031430-0.425563i      | 0.182 |                     |       |                     |       |
| 2              | 0.000001                 | 0.000 |                     |       |                     |       |
| 3              | 0.241332-0.501766i       | 0.310 |                     |       |                     |       |
| 4              | 0.000000                 | 0.000 |                     |       |                     |       |
| 5              | -0.031842-0.082976i      | 0.008 |                     |       |                     |       |
| 6              | 0.000000                 | 0.000 |                     |       |                     |       |

**Table S12.** Composition of wave functions for [Tb(TPP)(aza12C4)]<sup>+</sup> as extracted from RASSCF/RASSI/single\_sniso calculations with basis set 1.

| M <sub>J</sub> | Wave Functions and Energies |       |                     |       |                     |       |
|----------------|-----------------------------|-------|---------------------|-------|---------------------|-------|
|                | 1                           |       | 2                   |       | 3                   |       |
|                | 0.000                       |       | 0.058               |       | 144.860             |       |
|                | c                           | c     | c                   | c     | c                   | c     |
| -6             | -0.312088-0.633596i         | 0.499 | -0.312183-0.633771i | 0.499 | 0.008789+0.002533i  | 0.000 |
| -5             | 0.000457-0.000686i          | 0.000 | 0.000308-0.000650i  | 0.000 | 0.072676+0.615057i  | 0.384 |
| -4             | 0.004537+0.006879i          | 0.000 | 0.004421+0.007353i  | 0.000 | 0.173034-0.073061i  | 0.035 |
| -3             | -0.001084-0.013776i         | 0.000 | -0.000680-0.014575i | 0.000 | -0.045447-0.137244i | 0.021 |
| -2             | -0.028625+0.007447i         | 0.001 | -0.021806+0.006194i | 0.001 | -0.025734+0.088616i | 0.009 |
| -1             | 0.003366+0.003097i          | 0.000 | 0.005282+0.006674i  | 0.000 | 0.217772+0.033026i  | 0.049 |
| 0              | 0.000938-0.001507i          | 0.000 | 0.001993+0.001240i  | 0.000 | -0.078330-0.011063i | 0.006 |
| 1              | 0.004266+0.001651i          | 0.000 | -0.008321-0.001789i | 0.000 | -0.218400-0.028579i | 0.049 |
| 2              | 0.005968+0.028969i          | 0.001 | -0.004079-0.022298i | 0.001 | -0.000184-0.092277i | 0.009 |
| 3              | -0.012838+0.005115i         | 0.000 | 0.013375-0.005831i  | 0.000 | 0.081680-0.119288i  | 0.021 |
| 4              | -0.008176-0.001030i         | 0.000 | 0.008549+0.000717i  | 0.000 | 0.146030+0.118126i  | 0.035 |
| 5              | -0.000413+0.000713i         | 0.000 | 0.000447-0.000564i  | 0.000 | -0.240177+0.570870i | 0.384 |
| 6              | 0.706288                    | 0.499 | -0.706487           | 0.499 | 0.009147            | 0.000 |
| M <sub>J</sub> | 4                           |       | 5                   |       | 6                   |       |
|                | 146.052                     |       | 185.998             |       | 197.469             |       |
|                | c                           | c     | c                   | c     | c                   | c     |
| -6             | -0.010150+0.000156i         | 0.000 | -0.004075-0.018761i | 0.000 | 0.012842-0.017796i  | 0.000 |
| -5             | -0.160024-0.603205i         | 0.389 | -0.197475+0.135514i | 0.057 | -0.312351+0.017898i | 0.098 |
| -4             | -0.186892+0.091968i         | 0.043 | -0.302944-0.206966i | 0.135 | -0.149248-0.208411i | 0.066 |

|                |                     |       |                     |       |                     |       |
|----------------|---------------------|-------|---------------------|-------|---------------------|-------|
| -3             | 0.078484+0.034551i  | 0.007 | -0.151217+0.310714i | 0.119 | -0.249251+0.303205i | 0.154 |
| -2             | 0.054217-0.116112i  | 0.016 | 0.231572+0.022518i  | 0.054 | 0.065783+0.268707i  | 0.077 |
| -1             | -0.152857+0.041066i | 0.025 | 0.149885+0.115074i  | 0.036 | 0.068623-0.313714i  | 0.103 |
| 0              | 0.001463+0.190886i  | 0.036 | -0.278424+0.345401i | 0.197 | -0.030272-0.059176i | 0.004 |
| 1              | -0.153468-0.038718i | 0.025 | 0.144269+0.122040i  | 0.036 | 0.294550+0.127930i  | 0.103 |
| 2              | -0.055990-0.115268i | 0.016 | -0.071164-0.221514i | 0.054 | 0.179403+0.210583i  | 0.077 |
| 3              | 0.077945-0.035750i  | 0.007 | 0.271531-0.213730i  | 0.119 | -0.391726+0.024693i | 0.154 |
| 4              | 0.188280+0.089093i  | 0.043 | 0.266559+0.252104i  | 0.135 | -0.081666-0.242982i | 0.066 |
| 5              | -0.150760+0.605587i | 0.389 | 0.090505-0.221741i  | 0.057 | -0.197293+0.242815i | 0.098 |
| 6              | 0.010151            | 0.000 | 0.019198            | 0.000 | -0.021945           | 0.000 |
| M <sub>J</sub> | 7                   |       | 8                   |       | 9                   |       |
|                | 205.889             |       | 220.344             |       | 248.459             |       |
|                | c                   | c     | c                   | c     | c                   | c     |
| -6             | -0.008726+0.020867i | 0.001 | 0.000141-0.006678i  | 0.000 | 0.006655+0.006588i  | 0.000 |
| -5             | 0.003352+0.088188i  | 0.008 | -0.225095+0.020625i | 0.051 | 0.026928+0.016491i  | 0.001 |
| -4             | -0.119592-0.212918i | 0.060 | 0.013986-0.101504i  | 0.010 | -0.245605+0.544567i | 0.357 |
| -3             | 0.136440-0.070913i  | 0.024 | 0.063885-0.295647i  | 0.091 | -0.045976-0.009715i | 0.002 |
| -2             | -0.501422-0.178348i | 0.283 | 0.184891-0.019904i  | 0.035 | -0.089771+0.157752i | 0.033 |
| -1             | -0.174855+0.018982i | 0.031 | -0.063608-0.517635i | 0.272 | 0.173628-0.276068i  | 0.106 |
| 0              | -0.361405+0.240606i | 0.189 | -0.202858+0.198626i | 0.081 | 0.012361-0.030055i  | 0.001 |
| 1              | 0.084969-0.153996i  | 0.031 | -0.516179-0.074506i | 0.272 | -0.070831+0.318344i | 0.106 |
| 2              | -0.028899+0.531411i | 0.283 | 0.023798-0.184430i  | 0.035 | -0.047186+0.175265i | 0.033 |
| 3              | -0.118060+0.098520i | 0.024 | -0.296928+0.057638i | 0.091 | -0.039508-0.025442i | 0.002 |
| 4              | 0.150299+0.192475i  | 0.060 | 0.101777-0.011843i  | 0.010 | -0.208577+0.559795i | 0.357 |
| 5              | 0.080068+0.037114i  | 0.008 | 0.025365-0.224610i  | 0.051 | 0.030739+0.007225i  | 0.001 |
| 6              | -0.022618           | 0.001 | 0.006680            | 0.000 | -0.009364           | 0.000 |
| M <sub>J</sub> | 10                  |       | 11                  |       | 12                  |       |
|                | 283.594             |       | 296.282             |       | 313.474             |       |
|                | c                   | c     | c                   | c     | c                   | c     |
| -6             | -0.003714+0.003842i | 0.000 | -0.000082+0.009967i | 0.000 | -0.007327-0.010613i | 0.000 |
| -5             | 0.072831-0.029779i  | 0.006 | -0.035665+0.029484i | 0.002 | 0.005604+0.011482i  | 0.000 |
| -4             | 0.149051+0.395465i  | 0.179 | -0.139516-0.090369i | 0.028 | 0.077058-0.262607i  | 0.075 |
| -3             | 0.037510-0.050334i  | 0.004 | 0.363077-0.285618i  | 0.213 | 0.378381-0.036797i  | 0.145 |
| -2             | 0.112929-0.152394i  | 0.036 | -0.274324+0.126394i | 0.091 | 0.407168+0.016067i  | 0.166 |
| -1             | 0.158343+0.202458i  | 0.066 | -0.245546-0.308290i | 0.155 | -0.149835+0.267662i | 0.094 |
| 0              | -0.595481+0.252560i | 0.418 | -0.100388-0.101217i | 0.020 | 0.177567+0.093185i  | 0.040 |
| 1              | 0.035492+0.254562i  | 0.066 | 0.306260+0.248073i  | 0.155 | -0.135142+0.275373i | 0.094 |
| 2              | 0.188056+0.024738i  | 0.036 | 0.128645-0.273275i  | 0.091 | 0.244548+0.325944i  | 0.166 |
| 3              | -0.062259-0.008019i | 0.004 | 0.288594-0.360716i  | 0.213 | -0.184690-0.332289i | 0.145 |
| 4              | -0.180709-0.382038i | 0.179 | -0.089218-0.140255i | 0.028 | -0.172330+0.212610i | 0.075 |
| 5              | -0.072032+0.031662i | 0.006 | -0.029776+0.035421i | 0.002 | -0.012633+0.001911i | 0.000 |
| 6              | -0.005344           | 0.000 | 0.009967            | 0.000 | -0.012897           | 0.000 |
| M <sub>J</sub> | 13                  |       |                     |       |                     |       |
|                | 317.366             |       |                     |       |                     |       |
|                | c                   | c     |                     |       |                     |       |
| -6             | 0.000591+0.007593i  | 0.000 |                     |       |                     |       |
| -5             | 0.057729+0.002612i  | 0.003 |                     |       |                     |       |
| -4             | 0.112525+0.007784i  | 0.013 |                     |       |                     |       |
| -3             | 0.135013+0.447698i  | 0.219 |                     |       |                     |       |
| -2             | -0.437633+0.086493i | 0.199 |                     |       |                     |       |
| -1             | -0.131413+0.213213i | 0.063 |                     |       |                     |       |
| 0              | -0.061275-0.056695i | 0.007 |                     |       |                     |       |
| 1              | -0.202381+0.147550i | 0.063 |                     |       |                     |       |
| 2              | 0.052298-0.443023i  | 0.199 |                     |       |                     |       |
| 3              | -0.456819-0.099891i | 0.219 |                     |       |                     |       |
| 4              | 0.016486+0.111583i  | 0.013 |                     |       |                     |       |

|   |                     |       |
|---|---------------------|-------|
| 5 | -0.007080-0.057353i | 0.003 |
| 6 | 0.007616            | 0.000 |

**Table S13.** Composition of wave functions for  $[\text{Tb}(\text{TPP})(\text{aza12C4})]^+$  as extracted from RASSCF/RASSI/single\_aniso calculations with basis set 2.

| $M_J$ | Wave Functions and Energies |                    |                          |                     |                          |                     |
|-------|-----------------------------|--------------------|--------------------------|---------------------|--------------------------|---------------------|
|       | 1                           |                    | 2                        |                     | 3                        |                     |
|       | 0.000 $\text{cm}^{-1}$      |                    | 0.038 $\text{cm}^{-1}$   |                     | 140.929 $\text{cm}^{-1}$ |                     |
|       | c                           | c                  | c                        | c                   | c                        | c                   |
| -6    | -0.177167+0.683929i         | 0.499              | -0.177195+0.684058i      | 0.499               | -0.004515-0.005123i      | 0.000               |
| -5    | -0.000543+0.000090i         | 0.000              | -0.000463+0.000160i      | 0.000               | 0.405900-0.497248i       | 0.412               |
| -4    | 0.004359-0.006520i          | 0.000              | 0.004733-0.006595i       | 0.000               | -0.141764-0.101492i      | 0.030               |
| -3    | -0.011151+0.003903i         | 0.000              | -0.011869+0.003724i      | 0.000               | -0.096427+0.071537i      | 0.014               |
| -2    | 0.007484+0.024037i          | 0.001              | 0.006306+0.018779i       | 0.000               | 0.078543+0.010467i       | 0.006               |
| -1    | 0.003213-0.002651i          | 0.000              | 0.006171-0.003666i       | 0.000               | 0.032966-0.182179i       | 0.034               |
| 0     | -0.000870-0.001124i         | 0.000              | 0.001617-0.001251i       | 0.000               | -0.029541+0.065407i      | 0.005               |
| 1     | 0.003372-0.002446i          | 0.000              | -0.005096+0.005055i      | 0.000               | -0.114884+0.145181i      | 0.034               |
| 2     | 0.021392+0.013272i          | 0.001              | -0.016598-0.010814i      | 0.000               | -0.059781-0.052007i      | 0.006               |
| 3     | -0.006575+0.009816i         | 0.000              | 0.006581-0.010556i       | 0.000               | -0.010082-0.119641i      | 0.014               |
| 4     | -0.007404+0.002585i         | 0.000              | 0.007571-0.002928i       | 0.000               | 0.169872+0.039257i       | 0.030               |
| 5     | -0.000223+0.000503i         | 0.000              | 0.000271-0.000408i       | 0.000               | -0.104699+0.633284i      | 0.412               |
| 6     | 0.706503                    | 0.499              | -0.706635                | 0.499               | 0.006829                 | 0.000               |
| $M_J$ | 4                           |                    | 5                        |                     | 6                        |                     |
|       | 141.845 $\text{cm}^{-1}$    |                    | 183.925 $\text{cm}^{-1}$ |                     | 193.038 $\text{cm}^{-1}$ |                     |
|       | c                           | c                  | c                        | c                   | c                        | c                   |
|       | -6                          | 0.006363+0.004153i | 0.000                    | 0.007223-0.015385i  | 0.000                    | -0.017494+0.007672i |
| -5    | -0.339875+0.549805i         | 0.418              | -0.206520-0.058031i      | 0.046               | 0.202291+0.183964i       | 0.075               |
| -4    | 0.158758+0.100106i          | 0.035              | 0.050973-0.391528i       | 0.156               | -0.132271+0.259087i      | 0.085               |
| -3    | 0.010303-0.075420i          | 0.006              | -0.335707-0.062081i      | 0.117               | 0.378590+0.139909i       | 0.163               |
| -2    | -0.099842-0.029896i         | 0.011              | -0.004352+0.238762i      | 0.057               | 0.226995-0.116489i       | 0.065               |
| -1    | 0.028552+0.134949i          | 0.019              | -0.100717+0.123133i      | 0.025               | -0.318359-0.086068i      | 0.109               |
| 0     | 0.143671+0.042735i          | 0.022              | -0.238489-0.375440i      | 0.198               | -0.081737+0.017135i      | 0.007               |
| 1     | -0.097666+0.097405i         | 0.019              | -0.154264+0.038837i      | 0.025               | 0.256990-0.206680i       | 0.109               |
| 2     | -0.099950-0.029533i         | 0.011              | 0.217976+0.097534i       | 0.057               | 0.254667+0.015516i       | 0.065               |
| 3     | 0.032593-0.068790i          | 0.006              | -0.086478+0.330264i      | 0.117               | -0.290526+0.280178i      | 0.163               |
| 4     | 0.187661+0.002937i          | 0.035              | -0.376072-0.120257i      | 0.156               | -0.225189-0.184152i      | 0.085               |
| 5     | -0.015871+0.646180i         | 0.418              | -0.035240+0.211604i      | 0.046               | -0.111377+0.249719i      | 0.075               |
| 6     | 0.007598                    | 0.000              | -0.016996                | 0.000               | -0.019102                | 0.000               |
| $M_J$ | 7                           |                    | 8                        |                     | 9                        |                     |
|       | 203.619 $\text{cm}^{-1}$    |                    | 215.800 $\text{cm}^{-1}$ |                     | 238.274 $\text{cm}^{-1}$ |                     |
|       | c                           | c                  | c                        | c                   | c                        | c                   |
|       | -6                          | 0.017164-0.008924i | 0.000                    | -0.003281+0.004907i | 0.000                    | -0.000996-0.009170i |
| -5    | 0.049326-0.036615i          | 0.004              | 0.134856+0.130711i       | 0.035               | -0.000576-0.028060i      | 0.001               |
| -4    | -0.156546+0.198027i         | 0.064              | -0.108379+0.032620i      | 0.013               | 0.585026-0.013817i       | 0.342               |
| -3    | -0.112524-0.102462i         | 0.023              | -0.308109+0.018240i      | 0.095               | -0.006061+0.076730i      | 0.006               |
| -2    | -0.152980+0.519227i         | 0.293              | -0.048032-0.182322i      | 0.036               | 0.176071+0.086471i       | 0.038               |
| -1    | 0.000986+0.171320i          | 0.029              | -0.530616+0.032993i      | 0.283               | -0.259480-0.210943i      | 0.112               |
| 0     | 0.098831+0.404317i          | 0.173              | 0.130646+0.244520i       | 0.077               | -0.022371-0.020072i      | 0.001               |
| 1     | -0.078158-0.152456i         | 0.029              | -0.322369+0.422753i      | 0.283               | 0.237732+0.235181i       | 0.112               |
| 2     | 0.375257+0.390105i          | 0.293              | -0.124863-0.141271i      | 0.036               | 0.104981+0.165702i       | 0.038               |
| 3     | -0.052568+0.142817i         | 0.023              | -0.186425+0.245988i      | 0.095               | -0.075627+0.014312i      | 0.006               |
| 4     | 0.230247+0.103479i          | 0.064              | 0.087359-0.071962i       | 0.013               | 0.049445+0.583097i       | 0.342               |
| 5     | 0.060655+0.009731i          | 0.004              | -0.033699-0.184759i      | 0.035               | 0.027958-0.002458i       | 0.001               |
| 6     | -0.019345                   | 0.000              | 0.005903                 | 0.000               | -0.009224                | 0.000               |

| $M_J$ | <b>10</b>                |       | <b>11</b>                |       | <b>12</b>                |       |
|-------|--------------------------|-------|--------------------------|-------|--------------------------|-------|
|       | 269.988 $\text{cm}^{-1}$ |       | 282.213 $\text{cm}^{-1}$ |       | 297.665 $\text{cm}^{-1}$ |       |
|       | c                        | c     | c                        | c     | c                        | c     |
| -6    | 0.004092-0.001654i       | 0.000 | 0.005200-0.005792i       | 0.000 | -0.001437+0.011189i      | 0.000 |
| -5    | -0.064278-0.027067i      | 0.005 | 0.040244+0.012536i       | 0.002 | -0.001440-0.014889i      | 0.000 |
| -4    | 0.246939-0.338770i       | 0.176 | -0.035463+0.153807i      | 0.025 | -0.254257+0.025519i      | 0.065 |
| -3    | -0.041982+0.007671i      | 0.002 | -0.369539-0.295262i      | 0.224 | -0.078330-0.381089i      | 0.151 |
| -2    | -0.161557-0.073742i      | 0.032 | 0.146523+0.240716i       | 0.079 | 0.018506-0.386983i       | 0.150 |
| -1    | 0.191142-0.150540i       | 0.059 | -0.350181+0.197171i      | 0.162 | 0.282118+0.193783i       | 0.117 |
| 0     | 0.128535+0.661142i       | 0.454 | -0.119720+0.053407i      | 0.017 | 0.133236-0.117220i       | 0.031 |
| 1     | 0.233622+0.067960i       | 0.059 | 0.380656-0.128857i       | 0.162 | 0.156268+0.304504i       | 0.117 |
| 2     | 0.122161-0.128900i       | 0.032 | -0.081236-0.269841i      | 0.079 | 0.386188+0.030939i       | 0.150 |
| 3     | -0.041798+0.008617i      | 0.002 | 0.027160-0.472230i       | 0.224 | -0.368007-0.126235i      | 0.151 |
| 4     | -0.355877-0.221575i      | 0.176 | -0.138142-0.076362i      | 0.025 | -0.057698+0.248935i      | 0.065 |
| 5     | -0.049455+0.049178i      | 0.005 | -0.017557+0.038321i      | 0.002 | -0.014585-0.003324i      | 0.000 |
| 6     | -0.004413                | 0.000 | 0.007784                 | 0.000 | -0.011281                | 0.000 |
| $M_J$ | <b>13</b>                |       |                          |       |                          |       |
|       | 301.375 $\text{cm}^{-1}$ |       |                          |       |                          |       |
|       | c                        | c     |                          |       |                          |       |
| -6    | 0.004032-0.006676i       | 0.000 |                          |       |                          |       |
| -5    | -0.030628-0.042077i      | 0.003 |                          |       |                          |       |
| -4    | -0.016500-0.092355i      | 0.009 |                          |       |                          |       |
| -3    | 0.383504-0.227351i       | 0.199 |                          |       |                          |       |
| -2    | 0.122673+0.465388i       | 0.232 |                          |       |                          |       |
| -1    | 0.175023+0.142363i       | 0.051 |                          |       |                          |       |
| 0     | -0.103999+0.058683i      | 0.014 |                          |       |                          |       |
| 1     | 0.031375+0.223418i       | 0.051 |                          |       |                          |       |
| 2     | -0.334947-0.345609i      | 0.232 |                          |       |                          |       |
| 3     | -0.392879+0.210737i      | 0.199 |                          |       |                          |       |
| 4     | 0.070525+0.061871i       | 0.009 |                          |       |                          |       |
| 5     | -0.020183-0.047970i      | 0.003 |                          |       |                          |       |
| 6     | 0.007799                 | 0.000 |                          |       |                          |       |

**Table S14.** Dipole transition strengths for  $[\text{Tb}(\text{TPP})(12\text{C}4)]^+$  obtained from RASSCF/RASSI/single\_aniso calculations.

| <b>Basis Set 1</b> |     |                       |                                            |                       |                        |                               |
|--------------------|-----|-----------------------|--------------------------------------------|-----------------------|------------------------|-------------------------------|
| From               | To  | Oscillator Strength   | Einstein Coefficient ( $\text{sec}^{-1}$ ) |                       |                        | Total A ( $\text{sec}^{-1}$ ) |
|                    |     |                       | $A_x$                                      | $A_y$                 | $A_z$                  |                               |
| 1                  | 214 | $3.68 \times 10^{-3}$ | $1.36 \times 10^6$                         | $2.94 \times 10^5$    | $1.33 \times 10^{-9}$  | $1.65 \times 10^6$            |
| 1                  | 215 | $3.68 \times 10^{-3}$ | $2.94 \times 10^5$                         | $1.36 \times 10^6$    | $5.01 \times 10^{-9}$  | $1.65 \times 10^6$            |
| 1                  | 216 | $3.53 \times 10^{-3}$ | $2.55 \times 10^5$                         | $1.33 \times 10^6$    | $7.20 \times 10^{-9}$  | $1.59 \times 10^6$            |
| 1                  | 217 | $3.53 \times 10^{-3}$ | $1.33 \times 10^6$                         | $2.55 \times 10^5$    | $5.61 \times 10^{-9}$  | $1.59 \times 10^6$            |
| 1                  | 508 | 2.92                  | $2.40 \times 10^9$                         | $2.13 \times 10^{-9}$ | $1.83 \times 10^{-7}$  | $4.53 \times 10^9$            |
| 1                  | 509 | 2.92                  | $2.13 \times 10^9$                         | $2.40 \times 10^{-9}$ | $7.96 \times 10^{-9}$  | $4.53 \times 10^9$            |
| 1                  | 510 | 2.79                  | $9.45\text{E}+07$                          | $4.24 \times 10^{-9}$ | $7.60 \times 10^{-8}$  | $4.34 \times 10^9$            |
| 1                  | 511 | 2.79                  | $4.24 \times 10^9$                         | $9.46 \times 10^7$    | $3.86 \times 10^{-9}$  | $4.34 \times 10^9$            |
| <b>Basis Set 2</b> |     |                       |                                            |                       |                        |                               |
| From               | To  | Oscillator Strength   | Einstein Coefficient ( $\text{sec}^{-1}$ ) |                       |                        | Total A ( $\text{sec}^{-1}$ ) |
|                    |     |                       | $A_x$                                      | $A_y$                 | $A_z$                  |                               |
| 1                  | 212 | $3.83 \times 10^{-3}$ | $4.63 \times 10^5$                         | $1.27 \times 10^6$    | $2.08 \times 10^{-10}$ | $1.74 \times 10^6$            |
| 1                  | 213 | $3.82 \times 10^{-3}$ | $1.27 \times 10^6$                         | $4.63 \times 10^5$    | $1.10 \times 10^{-8}$  | $1.74 \times 10^6$            |
| 1                  | 214 | $3.70 \times 10^{-3}$ | $1.13 \times 10^6$                         | $5.54 \times 10^5$    | $1.31 \times 10^{-8}$  | $1.68 \times 10^6$            |

|   |     |                       |                    |                    |                       |                    |
|---|-----|-----------------------|--------------------|--------------------|-----------------------|--------------------|
| 1 | 215 | $3.70 \times 10^{-3}$ | $5.53 \times 10^5$ | $1.13 \times 10^6$ | $1.79 \times 10^{-9}$ | $1.68 \times 10^6$ |
| 1 | 510 | 2.88                  | $2.17 \times 10^9$ | $2.32 \times 10^9$ | $2.66 \times 10^{-8}$ | $4.49 \times 10^9$ |
| 1 | 511 | 2.87                  | $2.32 \times 10^9$ | $2.17 \times 10^9$ | $6.10 \times 10^{-9}$ | $4.49 \times 10^9$ |
| 1 | 514 | 2.71                  | $2.78 \times 10^9$ | $1.45 \times 10^9$ | $3.81 \times 10^{-7}$ | $4.23 \times 10^9$ |
| 1 | 515 | 2.71                  | $1.45 \times 10^9$ | $2.78 \times 10^9$ | $1.24 \times 10^{-9}$ | $4.23 \times 10^9$ |

**Table S15.** Low-Lying Spin Orbit of [Tb(TPP)(12C4)]<sup>+</sup> obtained from RASSCF/RASSI/single\_aniso calculations.

| Basis Set 1 |                            |                |                |                |                |                |
|-------------|----------------------------|----------------|----------------|----------------|----------------|----------------|
| S.O states  | Energy (cm <sup>-1</sup> ) | g <sub>z</sub> | g <sub>x</sub> | g <sub>y</sub> | L <sub>z</sub> | S <sub>z</sub> |
| 1           | 0.00                       | 17.98          | 0.00           | 0.00           | 2.99           | 2.99           |
| 2           | 0.11                       |                |                |                |                |                |
| 214         | 25962.06                   | 26.21          | 0.00           | 0.00           | 7.11           | 2.99           |
| 215         | 25962.07                   |                |                |                |                |                |
| 216         | 25971.45                   | 9.65           | 0.00           | 0.00           | -1.16          | 2.99           |
| 217         | 25971.45                   |                |                |                |                |                |
| 508         | 48259.89                   | 18.18          | 0.00           | 0.00           | 3.10           | 2.99           |
| 509         | 48259.89                   |                |                |                |                |                |
| 510         | 48269.40                   | 17.72          | 0.00           | 0.00           | 2.87           | 2.99           |
| 511         | 48269.40                   |                |                |                |                |                |
| Basis Set 2 |                            |                |                |                |                |                |
| S.O states  | Energy (cm <sup>-1</sup> ) | g <sub>z</sub> | g <sub>x</sub> | g <sub>y</sub> | L <sub>z</sub> | S <sub>z</sub> |
| 1           | 0.00                       | 17.98          | 0.00           | 0.00           | 2.99           | 2.99           |
| 2           | 0.08                       |                |                |                |                |                |
| 212         | 26093.63                   | 26.13          | 0.00           | 0.00           | 7.10           | 2.99           |
| 213         | 26093.63                   |                |                |                |                |                |
| 214         | 26101.24                   | 9.69           | 0.00           | 0.00           | -1.14          | 2.99           |
| 215         | 26101.24                   |                |                |                |                |                |
| 510         | 48396.49                   | 18.16          | 0.00           | 0.00           | 3.12           | 2.98           |
| 511         | 48396.49                   |                |                |                |                |                |
| 514         | 48404.49                   | 17.47          | 0.00           | 0.00           | 2.82           | 2.96           |
| 515         | 48404.49                   |                |                |                |                |                |
